# Supplementary material for: Identifying New Zealand Public Preferences for Pharmacist Prescribers in Primary Care: A Discrete Choice Experiment
Source: Springer Nature journal article supplement (doi:10.1007/s40271-021-00529-9), 2021-06-10
Supplement: 40271_2021_529_MOESM2_ESM.pdf [file 40271_2021_529_MOESM2_ESM.pdf]

**Online Supplementary File 2:**

**Journal name:** The Patient – Patient Centered Outcomes Research

**Article title:** Identifying New Zealand public preferences for pharmacist prescribers in primary care—a discrete choice experiment

**Author names:** Rakhee Raghunandan, Kirsten Howard, Carlo A Marra, June Tordoff, Alesha Smith

**Corresponding author:** Rakhee Raghunandan; School of Pharmacy, University of Otago, Dunedin, New Zealand; [rakhee.raghunandan@postgrad.otago.ac.nz](mailto:rakhee.raghunandan@postgrad.otago.ac.nz)

**2.1). Supplementary Table S1:**

**Supplementary Table S1: WTP and trade off calculations based on mixed MNL output**

*Supplementary Table S 1 WTP and trade-off calculations based on mixed MNL output*

| <b>Variable:</b>                             | <b>≤ 50K#<br/>WTP to<br/>AVOID<br/>(95% CI)</b> | <b>&gt; 50K<sup>†</sup><br/>WTP to<br/>AVOID<br/>(95% CI)</b> | <b>≤ 50K#<br/>WTP<br/>(95% CI)</b> | <b>&gt; 50K<sup>†</sup><br/>WTP<br/>(95% CI)</b> | <b>WTW<br/>days to<br/>AVOID<br/>(95% CI)</b> | <b>WTW<br/>days<br/>(95% CI)</b> |
|----------------------------------------------|-------------------------------------------------|---------------------------------------------------------------|------------------------------------|--------------------------------------------------|-----------------------------------------------|----------------------------------|
| 1). RNP_Waiting time<br>(per 1 day increase) | \$3.43<br>(\$3.32–<br>\$3.55)                   | \$3.68<br>(\$3.56–<br>\$3.79)                                 | -                                  | -                                                | -                                             | -                                |
| 2). PP_Waiting time<br>(per 1 day increase)  | \$5.41<br>(\$5.22–<br>\$5.60)                   | \$5.92<br>(\$5.63–<br>\$6.21)                                 | -                                  | -                                                | -                                             | -                                |
| 3). GP_Waiting time<br>(per 1 day increase)  | \$5.16<br>(\$4.90–<br>\$5.42)                   | \$5.52<br>(\$5.25–<br>\$5.80)                                 | -                                  | -                                                | -                                             | -                                |
| 4). RNP_ChangeCurrentMedsOnly                | \$5.90<br>(\$5.71–<br>\$6.09)                   | \$6.35<br>(\$6.14–<br>\$6.56)                                 | -                                  | -                                                | 1.77<br>(1.75–<br>1.79)                       | -                                |
| 5). PP_ChangeCurrentMedsOnly                 | -                                               | -                                                             | \$3.76<br>(\$3.61–<br>\$3.91)      | \$4.13<br>(\$3.91–<br>\$4.35)                    | -                                             | 0.75<br>(0.72–<br>0.78)          |
| 6). RNP_MedicinesOptimisation                | -                                               | -                                                             | \$9.99<br>(\$9.62–<br>\$10.35)     | \$10.82<br>(\$10.38–<br>\$11.25)                 | -                                             | 2.94<br>(2.89–<br>2.99)          |
| 7). PP_MedicinesOptimisation                 | -                                               | -                                                             | \$5.13<br>(\$4.97–<br>\$5.29)      | \$5.53<br>(\$5.33–<br>\$5.72)                    | -                                             | 1.01<br>(0.99–<br>1.03)          |
| 8). GP_MedicinesOptimisation                 | -                                               | -                                                             | \$3.16<br>(\$3.07–<br>\$3.26)      | \$3.42<br>(\$3.29–<br>\$3.54)                    | -                                             | 1.47<br>(1.11–<br>1.83)          |

≤ 50K# = Respondents with an annual household income of ≤ \$50,000 per year

> 50K<sup>†</sup> = Respondents with an annual household income of > \$50,000 per year

PP = Pharmacist prescriber

RNP = Registered nurse prescriber

GP = GP prescriber

WTP = Willingness to pay

WTW = Willingness to wait in days

CI = Confidence interval

2.2). **Supplementary Table S2:**

**Supplementary Table S2: Summary of respondents' reasons for ranking their most preferred prescriber**

*Supplementary Table S 2 Summary of respondents' reasons for ranking their most preferred prescriber*

| <b>Most preferred prescriber (MPRxer):</b>                         | <i>GP prescriber</i>                                                                                                                                                       | <i>Pharmacist prescriber</i>                                                                                                                                                                                                                                                                                                                                                                                                                | <i>Nurse prescriber</i>                                                                                                                                                                                                                                                     |
|--------------------------------------------------------------------|----------------------------------------------------------------------------------------------------------------------------------------------------------------------------|---------------------------------------------------------------------------------------------------------------------------------------------------------------------------------------------------------------------------------------------------------------------------------------------------------------------------------------------------------------------------------------------------------------------------------------------|-----------------------------------------------------------------------------------------------------------------------------------------------------------------------------------------------------------------------------------------------------------------------------|
| <b>% of sample with this ranking:</b>                              | 82%                                                                                                                                                                        | 9%                                                                                                                                                                                                                                                                                                                                                                                                                                          | 9%                                                                                                                                                                                                                                                                          |
| <b>Top 4 reasons for ranking the prescriber as most preferred:</b> | <ul style="list-style-type: none"> <li>● Training &amp; skills</li> <li>● Trust/emotional attachment</li> <li>● Access to medical history</li> <li>● Status quo</li> </ul> | <ul style="list-style-type: none"> <li>● Convenience</li> <li>● Training &amp; skills</li> <li>● Cost</li> <li>● Trust/emotional attachment</li> </ul>                                                                                                                                                                                                                                                                                      | <ul style="list-style-type: none"> <li>● Cost</li> <li>● Training &amp; skills</li> <li>● Convenience</li> <li>● Trust/emotional attachment</li> </ul>                                                                                                                      |
| <b>Notable respondent quotes:</b>                                  | <ul style="list-style-type: none"> <li>● “Traditionally that is what everyone is used to.”</li> <li>● “They have access to medical history.”</li> </ul>                    | <ul style="list-style-type: none"> <li>● “It means that I could get the prescription and medication in the same location/shop/visit.”</li> <li>● “The GP is really busy so I like to let patients who need consultations first choice of their time. The pharmacist is not usually located in the same location as the GP or nurse and it is a lot easier to consult the Pharmacist and at the same time get the script filled.”</li> </ul> | <ul style="list-style-type: none"> <li>● “The condition being dealt with I felt can be safely dealt with by a nurse prescriber.”</li> <li>● “The convenience of being able to quickly sort prescriptions without having to wait up to 7 days to see say the GP.”</li> </ul> |

2.3). **Supplementary Table S3:**

**Supplementary Table S3: Summary of respondents' reasons for their preference in choice task 5**

*Supplementary Table S 3 Summary of respondents' reasons for their preference in choice task 5*

| <b>Prescriber selected in choice task 5:</b>      | <i><b>GP prescriber</b></i>                                                                                                                                                                                                                                                                                                                                                                                                                                                                                                        | <i><b>Pharmacist prescriber</b></i>                                                                                                                                                                                                                                                                                                                                                                                                                                                                                                                                                 | <i><b>Nurse prescriber</b></i>                                                                                                                                                                                                                                                                                                                                         |
|---------------------------------------------------|------------------------------------------------------------------------------------------------------------------------------------------------------------------------------------------------------------------------------------------------------------------------------------------------------------------------------------------------------------------------------------------------------------------------------------------------------------------------------------------------------------------------------------|-------------------------------------------------------------------------------------------------------------------------------------------------------------------------------------------------------------------------------------------------------------------------------------------------------------------------------------------------------------------------------------------------------------------------------------------------------------------------------------------------------------------------------------------------------------------------------------|------------------------------------------------------------------------------------------------------------------------------------------------------------------------------------------------------------------------------------------------------------------------------------------------------------------------------------------------------------------------|
| <b>% of sample with this selected prescriber:</b> | 44%                                                                                                                                                                                                                                                                                                                                                                                                                                                                                                                                | 22%                                                                                                                                                                                                                                                                                                                                                                                                                                                                                                                                                                                 | 34%                                                                                                                                                                                                                                                                                                                                                                    |
| <b>Top 5 reasons for respondent's choice:</b>     | <ul style="list-style-type: none"> <li>● Lower cost</li> <li>● Training &amp; skills</li> <li>● Shorter waiting time for next consultation</li> <li>● Service type</li> <li>● Trust/emotive attachment</li> </ul>                                                                                                                                                                                                                                                                                                                  | <ul style="list-style-type: none"> <li>● Lower cost</li> <li>● Shorter waiting time for next consultation</li> <li>● Consultation type</li> <li>● Service type</li> <li>● Convenience</li> </ul>                                                                                                                                                                                                                                                                                                                                                                                    | <ul style="list-style-type: none"> <li>● Lower cost</li> <li>● Shorter waiting time for next consultation</li> <li>● Longer opening hours</li> <li>● Service type</li> <li>● Consultation type</li> </ul>                                                                                                                                                              |
| <b>Notable respondent quotes:</b>                 | <ul style="list-style-type: none"> <li>● “The GP and the registered Nurse prices were the same, so I chose the GP over the Nurse as in my opinion they have more training, and are more qualified to assess and prescribe medication. I don't mind waiting extra days to see a GP (who I trust) over a Nurse. I've never heard of a Pharmacist being able to prescribe medicine, and until I heard more about that, I wouldn't feel comfortable getting checked out by them.”</li> <li>● “Cheaper for my lower income.”</li> </ul> | <ul style="list-style-type: none"> <li>● “The cost was the largest factor and availability how soon I could see and how convenient the time they open.”</li> <li>● “It good and innovative.”</li> <li>● “I usually leave my appointment making until I have almost run out of pills. I am a firm believer that I do not need to see a GP to get repeat pills and would be extremely happy to see a Pharmacist or a Registered Nurse. Often a pharmacist has a tendency to know more about side effects of medications and what are the effects of mixing certain pills.”</li> </ul> | <ul style="list-style-type: none"> <li>● “I would choose the cheapest option ,on the least waiting time ,that met my needs. For myself, Doctor's visits are a luxury and I only go when absolutely necessary.”</li> <li>● “I choose that because it is reasonable quick time frame to health care professional, cheap and suits my current work situation.”</li> </ul> |

**2.3). Supplementary Table S4:**

**Supplementary Table S4: NZ public preferences for a primary care prescriber relative to GP prescriber using mixed MNL model WITHOUT alternative-specific respondent characteristic - Most preferred prescriber variable (MPRxer)**

*Supplementary Table S 4 NZ public preferences for a primary care prescriber relative to GP prescriber using mixed MNL model WITHOUT alternative-specific respondent characteristic - Most preferred prescriber variable (MPRxer)*

| <b>Preferences for primary care prescribers (mixed MNL model) – compared to reference utility level GP prescriber:</b><br>(WITHOUT alternative-specific respondent characteristic - Most preferred prescriber variable (MPRxer)) |                                       |                                       |                    |
|----------------------------------------------------------------------------------------------------------------------------------------------------------------------------------------------------------------------------------|---------------------------------------|---------------------------------------|--------------------|
| <b>Variable:</b>                                                                                                                                                                                                                 |                                       |                                       |                    |
| <i>Alternative-specific attributes:</i>                                                                                                                                                                                          | <b>Estimated mean &amp; (Std Dev)</b> | <b>95% CI</b>                         | <b>p value</b>     |
| 1). Alternative-specific constant (ASC)<br>(Reference level = GP prescriber)                                                                                                                                                     |                                       |                                       |                    |
| Pharmacist prescriber (PP)                                                                                                                                                                                                       | -0.337                                | (-0.995 – 0.322)                      | 0.3164             |
| Nurse prescriber (RNP)                                                                                                                                                                                                           | -1.181**                              | (-1.912 – -0.451)                     | 0.0015             |
| 2). Location of prescribing consultation<br>(Reference level = At GP practice)                                                                                                                                                   |                                       |                                       |                    |
| PP_ At community pharmacy                                                                                                                                                                                                        | -0.078<br>(0.044)                     | (-0.221 – 0.064)<br>(-0.476 – 0.564)  | 0.2824<br>0.8682   |
| RNP_ At community pharmacy                                                                                                                                                                                                       | -0.327**<br>(0.390**)                 | (-0.455 – -0.199)<br>(0.145 – 0.635)  | <0.0001<br>0.0018  |
| 3). Waiting time for next available consultation<br>(per 1 day increase)                                                                                                                                                         |                                       |                                       |                    |
| PP_ Waiting time                                                                                                                                                                                                                 | -0.307**<br>(0.150**)                 | (-0.364 – -0.249)<br>(0.098 – 0.202)  | <0.0001<br><0.0001 |
| RNP_ Waiting time                                                                                                                                                                                                                | -0.197**<br>(0.113**)                 | (-0.259 – -0.134)<br>(0.055 – 0.171)  | <0.0001<br>0.0001  |
| GP_ Waiting time                                                                                                                                                                                                                 | -0.282**<br>(0.235**)                 | (-0.337 – -0.226)<br>(0.184 – 0.286)  | <0.0001<br><0.0001 |
| 4). Type of service your consultation covers<br>(Reference level = Repeat prescription)                                                                                                                                          |                                       |                                       |                    |
| PP_Changes only to current medicines                                                                                                                                                                                             | 0.207*<br>(0.380)                     | (0.037 – 0.377)<br>(-0.004 – 0.764)   | 0.0169<br>0.0526   |
| RNP_Changes only to current medicines                                                                                                                                                                                            | -0.319**<br>(0.007)                   | (-0.483 – -0.155)<br>(-0.523 – 0.537) | 0.0001<br>0.9784   |
| GP_Changes only to current medicines                                                                                                                                                                                             | 0.007<br>(0.018)                      | (-0.146 – 0.160)<br>(-0.212 – 0.247)  | 0.9277<br>0.8810   |

|                                                                                                       |                                       |                                       |                    |
|-------------------------------------------------------------------------------------------------------|---------------------------------------|---------------------------------------|--------------------|
| PP_Optimisation of medicines                                                                          | 0.298**<br>(0.016)                    | (0.132 – 0.464)<br>(-0.470 – 0.502)   | 0.0004<br>0.9490   |
| RNP_Optimisation of medicines                                                                         | 0.571**<br>(0.429*)                   | (0.403 – 0.739)<br>(0.091 – 0.767)    | <0.0001<br>0.0130  |
| GP_Optimisation of medicines                                                                          | 0.180*<br>(0.080)                     | (0.019 – 0.341)<br>(-0.318 – 0.479)   | 0.0280<br>0.6930   |
| 5). Type of consultation<br>(Reference level = By appointment)                                        |                                       |                                       |                    |
| PP_Walk-in and wait clinic                                                                            | -0.172**<br>(0.624**)                 | (-0.297 – -0.047)<br>(0.429 – 0.819)  | 0.0068<br><0.0001  |
| RNP_Walk-in and wait clinic                                                                           | 0.155**<br>(0.064)                    | (0.044 – 0.267)<br>(-0.546 – 0.675)   | 0.0065<br>0.8361   |
| GP_Walk-in and wait clinic                                                                            | -0.106<br>(0.359*)                    | (-0.226 – 0.015)<br>(0.060 – 0.657)   | 0.0858<br>0.0186   |
| 6). Prescribing service operating hours<br>(per 1 hour increase)                                      |                                       |                                       |                    |
| PP_Operating hours                                                                                    | 0.022*<br>(0.013)                     | (0.002 – 0.042)<br>(-0.015 – 0.040)   | 0.0304<br>0.3620   |
| RNP_Operating hours                                                                                   | 0.052**<br>(0.005)                    | (0.034 – 0.070)<br>(-0.020 – 0.030)   | <0.0001<br>0.6890  |
| GP_Operating hours                                                                                    | -0.023*<br>(0.027)                    | (-0.041 – -0.005)<br>(-0.003 – 0.058) | 0.0114<br>0.0810   |
| <b>Generic choice attribute_sociodemographic interaction terms:</b>                                   |                                       |                                       |                    |
|                                                                                                       | <b>Estimated mean &amp; (Std Dev)</b> | <b>95% CI</b>                         | <b>p value</b>     |
| 7). Cost of consultation_annual household income<br>(per \$1 increase)                                |                                       |                                       |                    |
| Cost (income ≤\$50, 000 /year)                                                                        | -0.062**<br>(0.062**)                 | (-0.070 – -0.054)<br>(0.054 – 0.070)  | <0.0001<br><0.0001 |
| Cost (income > \$50, 000/year)                                                                        | -0.059**<br>(0.059**)                 | (-0.065 – -0.052)<br>(0.052 – 0.065)  | <0.0001<br><0.0001 |
| <b>Alternative-specific respondent characteristics:<br/>(Reference utility level = GP prescriber)</b> |                                       |                                       |                    |
|                                                                                                       | <b>Estimated mean &amp; (Std Dev)</b> | <b>95% CI</b>                         | <b>p value</b>     |
| 8). Age<br>(per year increase)                                                                        |                                       |                                       |                    |

|                                                                                                                           |                                               |                   |                |
|---------------------------------------------------------------------------------------------------------------------------|-----------------------------------------------|-------------------|----------------|
| PP_Age                                                                                                                    | -0.023**                                      | (-0.031 – -0.015) | <0.0001        |
| RNP_Age                                                                                                                   | -0.019**                                      | (-0.026 – -0.011) | <0.0001        |
| 9). Employment type<br>(Reference level = employed)                                                                       |                                               |                   |                |
| PP_Unemployed                                                                                                             | -0.165*                                       | (-0.305 – -0.026) | 0.0204         |
| RNP_Unemployed                                                                                                            | -0.139*                                       | (-0.274 – -0.005) | 0.0424         |
| 10). Residential location<br>(Reference level = major/provincial city)                                                    |                                               |                   |                |
| PP_Town/rural                                                                                                             | 0.014                                         | (-0.129 – 0.156)  | 0.8523         |
| RNP_Town/rural                                                                                                            | -0.001                                        | (-0.138 – 0.137)  | 0.9935         |
| 11). Number regular medicines taken per day (Meds)                                                                        |                                               |                   |                |
| PP_Meds                                                                                                                   | -0.046                                        | (-0.096 – 0.004)  | 0.0699         |
| RNP_Meds                                                                                                                  | -0.087**                                      | (-0.136 – -0.037) | 0.0006         |
| 12). Number of diagnosed chronic/long term conditions<br>(LTCS)                                                           |                                               |                   |                |
| PP_LTCS                                                                                                                   | 0.102**                                       | (0.041 – 0.163)   | 0.0010         |
| RNP_LTCS                                                                                                                  | 0.086**                                       | (0.026 – 0.146)   | 0.0052         |
| 13). Type of community pharmacy usually visited<br>(Reference level = Different community pharmacies most<br>of the time) |                                               |                   |                |
| PP_Same pharmacy most of the time                                                                                         | 0.123*                                        | (0.001 – 0.245)   | 0.0488         |
|                                                                                                                           |                                               |                   |                |
| <b>Generic respondent characteristics:</b><br>(Reference utility level = GP prescriber)                                   | <b>Estimated<br/>mean &amp;<br/>(Std Dev)</b> | <b>95% CI</b>     | <b>p value</b> |
| 14). GP visit frequency<br>(Reference level = Less often than once every 3 months)                                        |                                               |                   |                |
| Once every 3 months or more often                                                                                         | -0.143*                                       | (-0.263 – -0.022) | 0.0200         |
| <b>Model goodness of fit measures:</b>                                                                                    |                                               |                   |                |
| Log likelihood function                                                                                                   | -3855.04761                                   |                   |                |
| McFadden Pseudo R-squared                                                                                                 | 0.2404728                                     |                   |                |
| AIC                                                                                                                       | 7810.1                                        |                   |                |
| AIC/N                                                                                                                     | 1.690                                         |                   |                |
| N                                                                                                                         | 4620                                          |                   |                |
| K                                                                                                                         | 50                                            |                   |                |

PP = Pharmacist prescriber

RNP = Registered nurse prescriber

GP = GP prescriber

Std Dev = standard deviation

\*\* = significance at 1% level

\* = significance at 5% level

CI = confidence interval

AIC = Akaike information criterion
