# Supplementary material for: Identifying New Zealand Public Preferences for Pharmacist Prescribers in Primary Care: A Discrete Choice Experiment
Source: Springer Nature journal article supplement (doi:10.1007/s40271-021-00529-9), 2021-06-10
Supplement: 40271_2021_529_MOESM3_ESM.pdf [file 40271_2021_529_MOESM3_ESM.pdf]

### **Online Supplementary File 3:**

**Journal name:** The Patient – Patient Centered Outcomes Research

**Article title:** Identifying New Zealand public preferences for pharmacist prescribers in primary care—a discrete choice experiment

**Author names:** Rakhee Raghunandan, Kirsten Howard, Carlo A Marra, June Tordoff, Alesha Smith

**Corresponding author:** Rakhee Raghunandan; School of Pharmacy, University of Otago, Dunedin, New Zealand; [rakhee.raghunandan@postgrad.otago.ac.nz](mailto:rakhee.raghunandan@postgrad.otago.ac.nz)

### **3). WORD® VERSION OF DCE ELECTRONIC QUESTIONNAIRE—MAIN STUDY:**

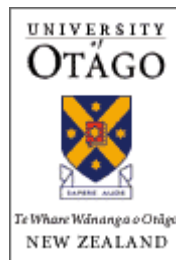

*Identifying patient preferences for pharmacist prescribers in primary care in NZ: a discrete choice experiment*

#### **INFORMATION SHEET FOR PARTICIPANTS**

Thank you for showing an interest in this project. This participant information sheet contains detailed information about the research project. Its purpose is to explain to you as clearly as possible what the project involves before you decide whether to take part in it or not.

Please read this sheet carefully before deciding whether to participate. If you decide to participate, we thank you. If you decide not to take part there will be no disadvantage to you and we thank you for considering our request.

#### **What is the aim of the project?**

You are invited to take part in a project being undertaken by Rakhee Raghunandan, a PhD candidate at the School of Pharmacy, University of Otago, as part of the requirements for her PhD. The purpose of the project is to better understand patient preferences for certain variables (e.g. location, cost, and operation hours of a prescribing service, the health professional that provides the prescribing service, etc.) that would encourage them to use a prescribing service (e.g. GPs, pharmacist prescribers, registered nurse prescribers) in primary care in New Zealand.

#### **Who is conducting the research?**

A research team based at the School of Pharmacy, University of Otago will be conducting the study. The research team consists of the PhD candidate (Rakhee Raghunandan) and her supervisors (Dr Alesha Smith, Associate Professor June Tordoff and Professor Carlo Marra).

#### **What type of participants are being sought?**

We are inviting people from the New Zealand general public, who are 18 years old and over, to participate in this project.

#### **What participants will be asked to do?**

Should you agree to take part, you will be asked to complete a 15 minute online survey, which will help us identify your preferences for these variables. Completing the survey will imply consent to participate in the project.

**Do I have to take part?**

No, you may decide not to take part in this project without any disadvantage to yourself. It is up to you to decide whether or not to take part. If you do not wish to take part, you may discard this survey now.

**What data or information will be collected and what use will be made of it?**

The project involves a set of choice questions where you will be asked to compare between different “profiles” of prescribers (e.g. GPs, pharmacist prescribers, registered nurse prescribers). The profiles will contain different combinations of the variables that are linked to their prescribing service, and then you choose the option that you most prefer for each choice question. Some of the information contained in the profiles may be hypothetical.

This questionnaire will also collect a variety of data including information that relates to:

- your views on GP prescribers, pharmacist prescribers and registered nurse prescribers;
- how you access your GP services;
- what services you access from your community pharmacy;
- what we can do to improve the questionnaire.

We will also ask you for some sociodemographic details about yourself. These details will be used for statistical purposes only.

All collected data will be anonymous and cannot be linked back to you. No material that could personally identify you will be used in any reports on this study. The results of the project may be published and will be available in the University of Otago Library (Dunedin, New Zealand), and every attempt will be made to preserve your anonymity.

Data obtained as a result of the research will be securely stored by the research team and retained for at least 5 years, as required by the University's research policy, after which it will be destroyed.

**What are the possible benefits of taking part?**

This study will help us understand the importance patients assign to certain variables that might encourage them to use a prescribing service in primary care. It may help to develop prescribing services that allow better use of health professionals who can prescribe prescription medicines, thereby ensuring that NZ patients have efficient access to their medicines.

**Will my taking part in the study be kept confidential?**

Yes. All the information about your participation in this study will be kept anonymous and confidential. All data from the study will be kept securely locked in a filing cabinet and/or password protected computer file in a restricted access part of the research team's premises.

**Can participants change their mind and withdraw from the project?**

Yes. You may withdraw from participating in the project any time during completion of the survey without any disadvantage to yourself. However, once you have completed the survey, your survey results will not be identifiable and cannot be withdrawn from the data set.

**What if participants have any questions?**

If you have any questions about our project, please feel free to contact:

Dr Alesha Smith

School of Pharmacy, University of Otago, PO Box 56, Dunedin, 9054

Phone: (03) 479 5052

E-mail: [alesha.smith@otago.ac.nz](mailto:alesha.smith@otago.ac.nz)

*AND/OR*

Rakhee Raghunandan

School of Pharmacy, University of Otago, PO Box 56, Dunedin, 9054

E-mail: [rakhee.raghunandan@postgrad.otago.ac.nz](mailto:rakhee.raghunandan@postgrad.otago.ac.nz)

This study has been approved by the Human Ethics Committee, University of Otago (Reference D19/019). If

you have any concerns about the ethical conduct of the research you may contact the Committee through the Human Ethics Committee Administrator (ph. 03 479-8256). Any issues you raise will be treated in confidence and investigated and you will be informed of the outcome.

**Background information:**

**\*\*\*Please read this as it will help you understand and answer the questions in this questionnaire to the best of your ability\*\*\***

Before starting this questionnaire, it would be useful to provide you with background information about the three prescribing NZ health professionals we want to include in our questionnaire, i.e. general practitioner prescribers (GP prescribers), pharmacist prescribers, and registered nurse prescribers.

Most people are not aware that in NZ we have prescribing health professionals known as **pharmacist prescribers**, and **registered nurse prescribers**.

- Pharmacist prescribers and registered nurse prescribers *are different from usual* pharmacists and registered nurses.
- Pharmacist prescribers and registered nurse prescribers are qualified pharmacists and registered nurses in NZ, who have *completed additional postgraduate training in their specialist areas*, to be able to prescribe some prescription medicines that your GP prescribes for you.
- Generally GP prescribers can prescribe almost all prescription medicines, while pharmacist prescribers and registered nurse prescribers can *only prescribe specific prescription medicines from an approved list* and these medicines must relate to their scope of practice (e.g. heart health, asthma, diabetes, kidney disease etc.).
- During a consultation with a pharmacist prescriber or a registered nurse prescriber, they will assess your condition, decide if and how your medicines need adjusting, and then write and sign your prescription for some approved prescription medicines, *just like your GP does*.

**Section 1: Screening questions:**

Q1). What is your age (in years)?

Q2). Please indicate the gender that you identify with

- Male
- Female
- Other, please specify

(Please note: you do not have to specify any information here if you are not comfortable with this).

Q3). Please indicate the ethnicity that you mainly identify with (please select only one option)

- European
- Maori
- Pacific peoples
- Asian/Indian
- Middle Eastern/Latin American/African
- Other, please specify

**Section 2: Cost variable reference question:**

Q4). What is the usual cost (to the nearest dollar) of your GP consultation?

**Please note:** The cost value entered cannot be a zero value. If your usual GP consultation is free, then please enter "1" as the answer.

### **Section 3: Choice questions**

#### **Instructions:**

#### **How to answer the choice questions in this section:**

We ask you to **IMAGINE the scenario** where you have had a particular health problem for some time i.e. **hypertension (high blood pressure)**, and you need to see a prescriber who can assess your current health condition, decide if and how your medicines need adjusting, and then write and sign your prescription for your medicines.

You then have 5 choice questions to answer.

For each choice question you are offered 3 different options (shown side-by-side) for your consultation, which vary according to:

- Who you see
- Location of consultation
- How long you have to wait for the next available consultation
- Cost of the consultation
- Type of service your consultation covers
- Type of consultation
- Prescribing service operating hours

We then ask that you choose which of the 3 options you **MOST PREFER** for each choice question, *even if none seem ideal*. There is no right or wrong answer—this is only your personal opinion. Each time you make a choice, you will have to make trade-offs. Some of the variables in the questions may not exist yet. The 5 choice questions may appear repetitive, but each one is unique.

We also ask you to **make the following assumptions** when making your choice:

- All the prescribers listed in the 3 options have completed all the clinical and legal training requirements to provide the prescribing service (i.e. they can write and sign the prescription for your required high blood pressure medicines).
- All the prescribers listed in the 3 options have appropriate access to your medical records to make clinical decisions.
- The prescriber will assess your current health condition, and may perform some screening and/or request additional laboratory testing as required.
- You will see a GP prescriber for a review of your condition at least once a year.
- The \$5 per prescription item charge that you pay when your medicines are dispensed at the pharmacy is a separate charge. It is not included in any costs within this questionnaire.

The next part of this section contains:

- **1 example question** with an explanation,
- **1 practice question** where you make a choice, and
- **5 choice questions** for this questionnaire which require you to make a choice in each question.

**Example Choice Question:**

Here is an **example** with the health scenario displayed first.

This is followed by the **example choice question**, which shows 3 consultation options with the 3 different prescribers displayed side-by-side.

The example choice question also shows which box has been ticked.

We then include an explanation for the choice made (i.e. the box that was ticked in the example).

As this is an example question, you do not have to tick a box for this question only.

**HEALTH SCENARIO:**

**IMAGINE you have had hypertension (i.e. high blood pressure) for some time and you need to see a prescriber who can assess your current health condition, decide if and how your medicines need adjusting, and then write and sign your prescription for your medicines.**

**IF these were the only options available at the time, which option would you choose for each choice question?**

**Make the following assumptions when making your choice:**

- All the prescribers listed in the 3 options have completed all the clinical and legal training requirements to provide the prescribing service (i.e. they can write and sign the prescription for your required high blood pressure medicines).
- All the prescribers listed in the 3 options have appropriate access to your medical records to make clinical decisions.
- The prescriber will assess your current health condition, and may perform screening and/or request additional laboratory testing as required.
- You will see a GP prescriber for a review of your condition at least once a year.
- The \$5 per prescription item charge that you pay when your medicines are dispensed at a pharmacy is a separate charge. It is not included in any of the costs within this questionnaire.

| <b>EXAMPLE CHOICE QUESTION:</b>                            |                                                                                                                                                                                                                                                                                        |                                                                                                                                                                                                                                                                                                                         |                                                                                                                                                                                                             |
|------------------------------------------------------------|----------------------------------------------------------------------------------------------------------------------------------------------------------------------------------------------------------------------------------------------------------------------------------------|-------------------------------------------------------------------------------------------------------------------------------------------------------------------------------------------------------------------------------------------------------------------------------------------------------------------------|-------------------------------------------------------------------------------------------------------------------------------------------------------------------------------------------------------------|
|                                                            | <b>Pharmacist prescriber</b>                                                                                                                                                                                                                                                           | <b>GP prescriber</b>                                                                                                                                                                                                                                                                                                    | <b>Registered Nurse prescriber</b>                                                                                                                                                                          |
| <b>Location of consultation</b>                            | At community pharmacy                                                                                                                                                                                                                                                                  | At GP practice                                                                                                                                                                                                                                                                                                          | At GP practice                                                                                                                                                                                              |
| <b>Next available consultation is</b>                      | Within 1 day from now                                                                                                                                                                                                                                                                  | 7 days from now                                                                                                                                                                                                                                                                                                         | 5 days from now                                                                                                                                                                                             |
| <b>Cost of the consultation</b>                            | \$24                                                                                                                                                                                                                                                                                   | \$20                                                                                                                                                                                                                                                                                                                    | \$16                                                                                                                                                                                                        |
| <b>Type of service your consultation covers</b>            | <ul style="list-style-type: none"> <li>Assessment of health condition.</li> <li>Some medicine changes required during this consultation.</li> <li>Issue prescription for current medicines with dose changes as needed, but no stoppages or additions to current medicines.</li> </ul> | <ul style="list-style-type: none"> <li>Assessment of health condition.</li> <li>Medicine optimisation required during this consultation.</li> <li>Issue prescription for optimisation of medicines, which includes changing doses of current medicines, stopping a current medicine, starting new medicines.</li> </ul> | <ul style="list-style-type: none"> <li>Assessment of health condition.</li> <li>No medicine changes required during this consultation.</li> <li>Issue repeat prescription for current medicines.</li> </ul> |
| <b>Type of consultation</b>                                | Walk-in and wait clinic                                                                                                                                                                                                                                                                | By appointment                                                                                                                                                                                                                                                                                                          | Walk-in and wait clinic                                                                                                                                                                                     |
| <b>Prescribing service operating hours</b>                 | 16 hours a day (e.g. 7am-11pm)                                                                                                                                                                                                                                                         | 8 hours a day (e.g. 9am—5pm)                                                                                                                                                                                                                                                                                            | 8 hours a day (e.g. 9am—5pm)                                                                                                                                                                                |
| <b>Which option would you choose?</b><br>Tick one box only | <input checked="" type="checkbox"/>                                                                                                                                                                                                                                                    | <input type="checkbox"/>                                                                                                                                                                                                                                                                                                | <input type="checkbox"/>                                                                                                                                                                                    |

**Explanation of the choice made above:** In the above example, the person ticked the box for the first option, to show they **most preferred** to see a:

- pharmacist prescriber
- within 1 day from now
- at a walk-in and wait clinic
- in a community pharmacy
- that is open for 16 hours a day
- to get their updated prescription that included only dose changes to their current medicines
- at a cost of \$24.



**Practice Choice Question:**  
Q5).

**HEALTH SCENARIO:**

**IMAGINE** you have had hypertension (i.e. high blood pressure) for some time and you need to see a prescriber who can assess your current health condition, decide if and how your medicines need adjusting, and then write and sign your prescription for your medicines.

**IF** these were the only options available at the time, which option would you choose for each choice question?

**Make the following assumptions when making your choice:**

- All the prescribers listed in the 3 options have completed all the clinical and legal training requirements to provide the prescribing service (i.e. they can write and sign the prescription for your required high blood pressure medicines).
- All the prescribers listed in the 3 options have appropriate access to your medical records to make clinical decisions.
- The prescriber will assess your current health condition, and may perform screening and/or request additional laboratory testing as required.
- You will see a GP prescriber for a review of your condition at least once a year.
- The \$5 per prescription item charge that you pay when your medicines are dispensed at a pharmacy is a separate charge. It is not included in any of the costs within this questionnaire.

| <b>PRACTICE CHOICE QUESTION:</b>                           |                                                                                                                                                                                                                                                                                                                               |                                                                                                                                                                                                                                                                                                                               |                                                                                                                                                                                                                   |
|------------------------------------------------------------|-------------------------------------------------------------------------------------------------------------------------------------------------------------------------------------------------------------------------------------------------------------------------------------------------------------------------------|-------------------------------------------------------------------------------------------------------------------------------------------------------------------------------------------------------------------------------------------------------------------------------------------------------------------------------|-------------------------------------------------------------------------------------------------------------------------------------------------------------------------------------------------------------------|
|                                                            | <b>GP prescriber</b>                                                                                                                                                                                                                                                                                                          | <b>Pharmacist prescriber</b>                                                                                                                                                                                                                                                                                                  | <b>Registered Nurse prescriber</b>                                                                                                                                                                                |
| <b>Location of consultation</b>                            | At GP practice                                                                                                                                                                                                                                                                                                                | At community pharmacy                                                                                                                                                                                                                                                                                                         | At GP practice                                                                                                                                                                                                    |
| <b>Next available consultation is</b>                      | Within 1 day from now                                                                                                                                                                                                                                                                                                         | 3 days from now                                                                                                                                                                                                                                                                                                               | 5 days from now                                                                                                                                                                                                   |
| <b>Cost of the consultation</b>                            | \$16                                                                                                                                                                                                                                                                                                                          | \$20                                                                                                                                                                                                                                                                                                                          | \$20                                                                                                                                                                                                              |
| <b>Type of service your consultation covers</b>            | <ul style="list-style-type: none"> <li>• Assessment of health condition.</li> <li>• Medicine optimisation required during this consultation.</li> <li>• Issue prescription for optimisation of medicines, which includes changing doses of current medicines, stopping a current medicine, starting new medicines.</li> </ul> | <ul style="list-style-type: none"> <li>• Assessment of health condition.</li> <li>• Medicine optimisation required during this consultation.</li> <li>• Issue prescription for optimisation of medicines, which includes changing doses of current medicines, stopping a current medicine, starting new medicines.</li> </ul> | <ul style="list-style-type: none"> <li>• Assessment of health condition.</li> <li>• No medicine changes required during this consultation.</li> <li>• Issue repeat prescription for current medicines.</li> </ul> |
| <b>Type of consultation</b>                                | By appointment                                                                                                                                                                                                                                                                                                                | By appointment                                                                                                                                                                                                                                                                                                                | Walk-in and wait clinic                                                                                                                                                                                           |
| <b>Prescribing service operating hours</b>                 | 24 hours a day                                                                                                                                                                                                                                                                                                                | Open 16 hours a day (e.g. 7am-11pm)                                                                                                                                                                                                                                                                                           | 8 hours a day (e.g. 9am—5pm)                                                                                                                                                                                      |
| <b>Which option would you choose?</b><br>Tick one box only | <input type="checkbox"/>                                                                                                                                                                                                                                                                                                      | <input type="checkbox"/>                                                                                                                                                                                                                                                                                                      | <input type="checkbox"/>                                                                                                                                                                                          |

**Choice questions—BLOCK A:**

**Choice Questions for this questionnaire:**

Please consider the health scenario listed below and answer the **5 choice questions** that follow by ticking the option you most prefer for each choice question:

**HEALTH SCENARIO:**  
**IMAGINE you have had hypertension (i.e. high blood pressure) for some time and you need to see a prescriber who can assess your current health condition, decide if and how your medicines need adjusting, and then write and sign your prescription for your medicines.**

**IF these were the only options available at the time, which option would you choose for each choice question?**

**Make the following assumptions when making your choice:**

- All the prescribers listed in the 3 options have completed all the clinical and legal training requirements to provide the prescribing service (i.e. they can write and sign the prescription for your required high blood pressure medicines).
- All the prescribers listed in the 3 options have appropriate access to your medical records to make clinical decisions.
- The prescriber will assess your current health condition, and may perform screening and/or request additional laboratory testing as required.
- You will see a GP prescriber for a review of your condition at least once a year.
- The \$5 per prescription item charge that you pay when your medicines are dispensed at a pharmacy is a separate charge. It is not included in any of the costs within this questionnaire.

Q6.A1).

| Choice question A1:                                        |                                                                                                                                                                                                                                                                                              |                                                                                                                                                                                                                   |                                                                                                                                                                                                                   |
|------------------------------------------------------------|----------------------------------------------------------------------------------------------------------------------------------------------------------------------------------------------------------------------------------------------------------------------------------------------|-------------------------------------------------------------------------------------------------------------------------------------------------------------------------------------------------------------------|-------------------------------------------------------------------------------------------------------------------------------------------------------------------------------------------------------------------|
|                                                            | GP prescriber                                                                                                                                                                                                                                                                                | Registered Nurse prescriber                                                                                                                                                                                       | Pharmacist prescriber                                                                                                                                                                                             |
| <b>Location of consultation</b>                            | At GP practice                                                                                                                                                                                                                                                                               | At GP practice                                                                                                                                                                                                    | At community pharmacy                                                                                                                                                                                             |
| <b>Next available consultation is</b>                      | 7 days from now                                                                                                                                                                                                                                                                              | 3 days from now                                                                                                                                                                                                   | 5 days from now                                                                                                                                                                                                   |
| <b>Cost of the consultation</b>                            | usual GP cost plus 20%                                                                                                                                                                                                                                                                       | usual GP cost minus 20%                                                                                                                                                                                           | usual GP cost minus 20%                                                                                                                                                                                           |
| <b>Type of service your consultation covers</b>            | <ul style="list-style-type: none"> <li>• Assessment of health condition.</li> <li>• Some medicine changes required during this consultation.</li> <li>• Issue prescription for current medicines with dose changes as needed, but no stoppages or additions to current medicines.</li> </ul> | <ul style="list-style-type: none"> <li>• Assessment of health condition.</li> <li>• No medicine changes required during this consultation.</li> <li>• Issue repeat prescription for current medicines.</li> </ul> | <ul style="list-style-type: none"> <li>• Assessment of health condition.</li> <li>• No medicine changes required during this consultation.</li> <li>• Issue repeat prescription for current medicines.</li> </ul> |
| <b>Type of consultation</b>                                | By appointment                                                                                                                                                                                                                                                                               | Walk-in and wait clinic                                                                                                                                                                                           | Walk-in and wait clinic                                                                                                                                                                                           |
| <b>Prescribing service operating hours</b>                 | Open 16 hours a day (e.g. 7am-11pm)                                                                                                                                                                                                                                                          | Open 24 hours day                                                                                                                                                                                                 | Open 8 hours a day (e.g. 9am-5pm)                                                                                                                                                                                 |
| <b>Which option would you choose?</b><br>Tick one box only | <input type="checkbox"/>                                                                                                                                                                                                                                                                     | <input type="checkbox"/>                                                                                                                                                                                          | <input type="checkbox"/>                                                                                                                                                                                          |

Q7.A2).

| Choice question A2:                                 |                                                                                                                                                                                                                                                                                                                         |                                                                                                                                                                                                                                                                                                                         |                                                                                                                                                                                                                                                                                        |
|-----------------------------------------------------|-------------------------------------------------------------------------------------------------------------------------------------------------------------------------------------------------------------------------------------------------------------------------------------------------------------------------|-------------------------------------------------------------------------------------------------------------------------------------------------------------------------------------------------------------------------------------------------------------------------------------------------------------------------|----------------------------------------------------------------------------------------------------------------------------------------------------------------------------------------------------------------------------------------------------------------------------------------|
|                                                     | GP prescriber                                                                                                                                                                                                                                                                                                           | Registered Nurse prescriber                                                                                                                                                                                                                                                                                             | Pharmacist prescriber                                                                                                                                                                                                                                                                  |
| Location of consultation                            | At GP practice                                                                                                                                                                                                                                                                                                          | At community pharmacy                                                                                                                                                                                                                                                                                                   | At GP practice                                                                                                                                                                                                                                                                         |
| Next available consultation is                      | 7 days from now                                                                                                                                                                                                                                                                                                         | 3 days from now                                                                                                                                                                                                                                                                                                         | Within 1 day from now                                                                                                                                                                                                                                                                  |
| Cost of the consultation                            | usual GP cost minus 20%                                                                                                                                                                                                                                                                                                 | usual GP cost plus 20%                                                                                                                                                                                                                                                                                                  | usual GP cost minus 20%                                                                                                                                                                                                                                                                |
| Type of service your consultation covers            | <ul style="list-style-type: none"> <li>Assessment of health condition.</li> <li>Medicine optimisation required during this consultation.</li> <li>Issue prescription for optimisation of medicines, which includes changing doses of current medicines, stopping a current medicine, starting new medicines.</li> </ul> | <ul style="list-style-type: none"> <li>Assessment of health condition.</li> <li>Medicine optimisation required during this consultation.</li> <li>Issue prescription for optimisation of medicines, which includes changing doses of current medicines, stopping a current medicine, starting new medicines.</li> </ul> | <ul style="list-style-type: none"> <li>Assessment of health condition.</li> <li>Some medicine changes required during this consultation.</li> <li>Issue prescription for current medicines with dose changes as needed, but no stoppages or additions to current medicines.</li> </ul> |
| Type of consultation                                | By appointment                                                                                                                                                                                                                                                                                                          | By appointment                                                                                                                                                                                                                                                                                                          | Walk-in and wait clinic                                                                                                                                                                                                                                                                |
| Prescribing service operating hours                 | Open 8 hours a day (e.g. 9am-5pm)                                                                                                                                                                                                                                                                                       | Open 16 hours a day (e.g. 7am-11pm)                                                                                                                                                                                                                                                                                     | Open 24 hours day                                                                                                                                                                                                                                                                      |
| Which option would you choose?<br>Tick one box only | <input type="checkbox"/>                                                                                                                                                                                                                                                                                                | <input type="checkbox"/>                                                                                                                                                                                                                                                                                                | <input type="checkbox"/>                                                                                                                                                                                                                                                               |

Q8.A3).

| Choice question A3:                                 |                                                                                                                                                                                                             |                                                                                                                                                                                                                                                                                                                         |                                                                                                                                                                                                                                                                                        |
|-----------------------------------------------------|-------------------------------------------------------------------------------------------------------------------------------------------------------------------------------------------------------------|-------------------------------------------------------------------------------------------------------------------------------------------------------------------------------------------------------------------------------------------------------------------------------------------------------------------------|----------------------------------------------------------------------------------------------------------------------------------------------------------------------------------------------------------------------------------------------------------------------------------------|
|                                                     | GP prescriber                                                                                                                                                                                               | Registered Nurse prescriber                                                                                                                                                                                                                                                                                             | Pharmacist prescriber                                                                                                                                                                                                                                                                  |
| Location of consultation                            | At GP practice                                                                                                                                                                                              | At community pharmacy                                                                                                                                                                                                                                                                                                   | At GP practice                                                                                                                                                                                                                                                                         |
| Next available consultation is                      | 5 days from now                                                                                                                                                                                             | Within 1 day from now                                                                                                                                                                                                                                                                                                   | 7 days from now                                                                                                                                                                                                                                                                        |
| Cost of the consultation                            | usual GP cost minus 100%                                                                                                                                                                                    | usual GP cost minus 20%                                                                                                                                                                                                                                                                                                 | usual GP cost plus 20%                                                                                                                                                                                                                                                                 |
| Type of service your consultation covers            | <ul style="list-style-type: none"> <li>Assessment of health condition.</li> <li>No medicine changes required during this consultation.</li> <li>Issue repeat prescription for current medicines.</li> </ul> | <ul style="list-style-type: none"> <li>Assessment of health condition.</li> <li>Medicine optimisation required during this consultation.</li> <li>Issue prescription for optimisation of medicines, which includes changing doses of current medicines, stopping a current medicine, starting new medicines.</li> </ul> | <ul style="list-style-type: none"> <li>Assessment of health condition.</li> <li>Some medicine changes required during this consultation.</li> <li>Issue prescription for current medicines with dose changes as needed, but no stoppages or additions to current medicines.</li> </ul> |
| Type of consultation                                | By appointment                                                                                                                                                                                              | Walk-in and wait clinic                                                                                                                                                                                                                                                                                                 | By appointment                                                                                                                                                                                                                                                                         |
| Prescribing service operating hours                 | Open 16 hours a day (e.g. 7am-11pm)                                                                                                                                                                         | Open 8 hours a day (e.g. 9am-5pm)                                                                                                                                                                                                                                                                                       | Open 24 hours day                                                                                                                                                                                                                                                                      |
| Which option would you choose?<br>Tick one box only | <input type="checkbox"/>                                                                                                                                                                                    | <input type="checkbox"/>                                                                                                                                                                                                                                                                                                | <input type="checkbox"/>                                                                                                                                                                                                                                                               |

Q9.A4).

| <b>Choice question A4:</b>                                 |                                                                                                                                                                                                             |                                                                                                                                                                                                                                                                                                                         |                                                                                                                                                                                                                                                                                        |
|------------------------------------------------------------|-------------------------------------------------------------------------------------------------------------------------------------------------------------------------------------------------------------|-------------------------------------------------------------------------------------------------------------------------------------------------------------------------------------------------------------------------------------------------------------------------------------------------------------------------|----------------------------------------------------------------------------------------------------------------------------------------------------------------------------------------------------------------------------------------------------------------------------------------|
|                                                            | <b>GP prescriber</b>                                                                                                                                                                                        | <b>Registered Nurse prescriber</b>                                                                                                                                                                                                                                                                                      | <b>Pharmacist prescriber</b>                                                                                                                                                                                                                                                           |
| <b>Location of consultation</b>                            | At GP practice                                                                                                                                                                                              | At community pharmacy                                                                                                                                                                                                                                                                                                   | At GP practice                                                                                                                                                                                                                                                                         |
| <b>Next available consultation is</b>                      | Within 1 day from now                                                                                                                                                                                       | 5 days from now                                                                                                                                                                                                                                                                                                         | 7 days from now                                                                                                                                                                                                                                                                        |
| <b>Cost of the consultation</b>                            | same as usual GP cost                                                                                                                                                                                       | usual GP cost minus 100%                                                                                                                                                                                                                                                                                                | usual GP cost minus 100%                                                                                                                                                                                                                                                               |
| <b>Type of service your consultation covers</b>            | <ul style="list-style-type: none"> <li>Assessment of health condition.</li> <li>No medicine changes required during this consultation.</li> <li>Issue repeat prescription for current medicines.</li> </ul> | <ul style="list-style-type: none"> <li>Assessment of health condition.</li> <li>Medicine optimisation required during this consultation.</li> <li>Issue prescription for optimisation of medicines, which includes changing doses of current medicines, stopping a current medicine, starting new medicines.</li> </ul> | <ul style="list-style-type: none"> <li>Assessment of health condition.</li> <li>Some medicine changes required during this consultation.</li> <li>Issue prescription for current medicines with dose changes as needed, but no stoppages or additions to current medicines.</li> </ul> |
| <b>Type of consultation</b>                                | Walk-in and wait clinic                                                                                                                                                                                     | By appointment                                                                                                                                                                                                                                                                                                          | Walk-in and wait clinic                                                                                                                                                                                                                                                                |
| <b>Prescribing service operating hours</b>                 | Open 8 hours a day (e.g. 9am-5pm)                                                                                                                                                                           | Open 24 hours day                                                                                                                                                                                                                                                                                                       | Open 16 hours a day (e.g. 7am-11pm)                                                                                                                                                                                                                                                    |
| <b>Which option would you choose?</b><br>Tick one box only | <input type="checkbox"/>                                                                                                                                                                                    | <input type="checkbox"/>                                                                                                                                                                                                                                                                                                | <input type="checkbox"/>                                                                                                                                                                                                                                                               |

Q10.A5).

| <b>Choice question A5:</b>                                 |                                                                                                                                                                                                                                                                                                                         |                                                                                                                                                                                                                                                                                        |                                                                                                                                                                                                                                                                                        |
|------------------------------------------------------------|-------------------------------------------------------------------------------------------------------------------------------------------------------------------------------------------------------------------------------------------------------------------------------------------------------------------------|----------------------------------------------------------------------------------------------------------------------------------------------------------------------------------------------------------------------------------------------------------------------------------------|----------------------------------------------------------------------------------------------------------------------------------------------------------------------------------------------------------------------------------------------------------------------------------------|
|                                                            | <b>GP prescriber</b>                                                                                                                                                                                                                                                                                                    | <b>Registered Nurse prescriber</b>                                                                                                                                                                                                                                                     | <b>Pharmacist prescriber</b>                                                                                                                                                                                                                                                           |
| <b>Location of consultation</b>                            | At GP practice                                                                                                                                                                                                                                                                                                          | At GP practice                                                                                                                                                                                                                                                                         | At community pharmacy                                                                                                                                                                                                                                                                  |
| <b>Next available consultation is</b>                      | Within 1 day from now                                                                                                                                                                                                                                                                                                   | 3 days from now                                                                                                                                                                                                                                                                        | 7 days from now                                                                                                                                                                                                                                                                        |
| <b>Cost of the consultation</b>                            | usual GP cost plus 20%                                                                                                                                                                                                                                                                                                  | usual GP cost minus 100%                                                                                                                                                                                                                                                               | same as usual GP cost                                                                                                                                                                                                                                                                  |
| <b>Type of service your consultation covers</b>            | <ul style="list-style-type: none"> <li>Assessment of health condition.</li> <li>Medicine optimisation required during this consultation.</li> <li>Issue prescription for optimisation of medicines, which includes changing doses of current medicines, stopping a current medicine, starting new medicines.</li> </ul> | <ul style="list-style-type: none"> <li>Assessment of health condition.</li> <li>Some medicine changes required during this consultation.</li> <li>Issue prescription for current medicines with dose changes as needed, but no stoppages or additions to current medicines.</li> </ul> | <ul style="list-style-type: none"> <li>Assessment of health condition.</li> <li>Some medicine changes required during this consultation.</li> <li>Issue prescription for current medicines with dose changes as needed, but no stoppages or additions to current medicines.</li> </ul> |
| <b>Type of consultation</b>                                | By appointment                                                                                                                                                                                                                                                                                                          | Walk-in and wait clinic                                                                                                                                                                                                                                                                | Walk-in and wait clinic                                                                                                                                                                                                                                                                |
| <b>Prescribing service operating hours</b>                 | Open 16 hours a day (e.g. 7am-11pm)                                                                                                                                                                                                                                                                                     | Open 24 hours day                                                                                                                                                                                                                                                                      | Open 8 hours a day (e.g. 9am-5pm)                                                                                                                                                                                                                                                      |
| <b>Which option would you choose?</b><br>Tick one box only | <input type="checkbox"/>                                                                                                                                                                                                                                                                                                | <input type="checkbox"/>                                                                                                                                                                                                                                                               | <input type="checkbox"/>                                                                                                                                                                                                                                                               |

Q11.A6). To help us better understand decision making in this questionnaire, can you please briefly explain why and how you made your choice in choice question A5 above?

You can see what you chose for choice question 5 by clicking on the “prev” button and then the “next” button to come back to this question.

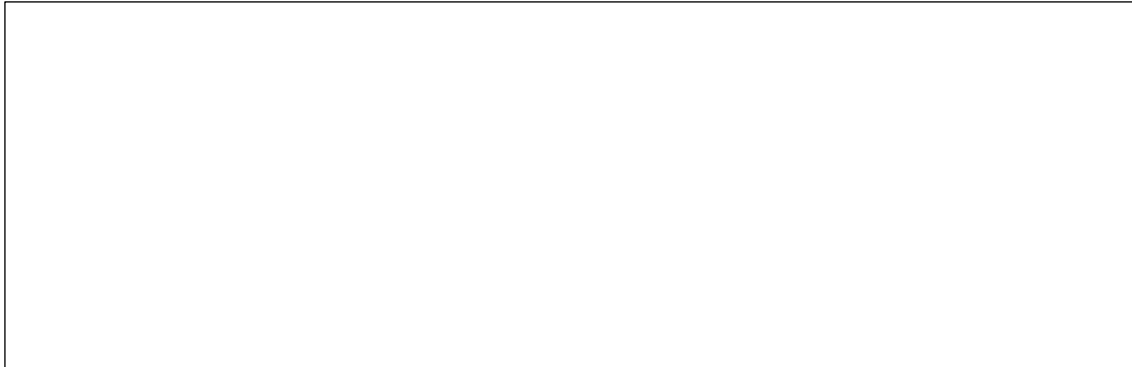A large, empty rectangular box with a thin black border, intended for the user to provide a brief explanation of their choice in question A5.

**Choice questions—BLOCK B:**

**Choice Questions for this questionnaire:**

Please consider the health scenario listed below and answer the **5 choice questions** that follow by ticking the option you most prefer for each choice question:

**HEALTH SCENARIO:**  
**IMAGINE you have had hypertension (i.e. high blood pressure) for some time and you need to see a prescriber who can assess your current health condition, decide if and how your medicines need adjusting, and then write and sign your prescription for your medicines.**

**IF these were the only options available at the time, which option would you choose for each choice question?**

**Make the following assumptions when making your choice:**

- All the prescribers listed in the 3 options have completed all the clinical and legal training requirements to provide the prescribing service (i.e. they can write and sign the prescription for your required high blood pressure medicines).
- All the prescribers listed in the 3 options have appropriate access to your medical records to make clinical decisions.
- The prescriber will assess your current health condition, and may perform screening and/or request additional laboratory testing as required.
- You will see a GP prescriber for a review of your condition at least once a year.
- The \$5 per prescription item charge that you pay when your medicines are dispensed at a pharmacy is a separate charge. It is not included in any of the costs within this questionnaire.

Q6.B1).

| Choice question B1:                                        |                                                                                                                                                                                                                                                                                              |                                                                                                                                                                                                                   |                                                                                                                                                                                                                                                                                                                               |
|------------------------------------------------------------|----------------------------------------------------------------------------------------------------------------------------------------------------------------------------------------------------------------------------------------------------------------------------------------------|-------------------------------------------------------------------------------------------------------------------------------------------------------------------------------------------------------------------|-------------------------------------------------------------------------------------------------------------------------------------------------------------------------------------------------------------------------------------------------------------------------------------------------------------------------------|
|                                                            | GP prescriber                                                                                                                                                                                                                                                                                | Registered Nurse prescriber                                                                                                                                                                                       | Pharmacist prescriber                                                                                                                                                                                                                                                                                                         |
| <b>Location of consultation</b>                            | At GP practice                                                                                                                                                                                                                                                                               | At community pharmacy                                                                                                                                                                                             | At GP practice                                                                                                                                                                                                                                                                                                                |
| <b>Next available consultation is</b>                      | 3 days from now                                                                                                                                                                                                                                                                              | 7 days from now                                                                                                                                                                                                   | 3 days from now                                                                                                                                                                                                                                                                                                               |
| <b>Cost of the consultation</b>                            | usual GP cost plus 20%                                                                                                                                                                                                                                                                       | usual GP cost minus 100%                                                                                                                                                                                          | usual GP cost minus 20%                                                                                                                                                                                                                                                                                                       |
| <b>Type of service your consultation covers</b>            | <ul style="list-style-type: none"> <li>• Assessment of health condition.</li> <li>• Some medicine changes required during this consultation.</li> <li>• Issue prescription for current medicines with dose changes as needed, but no stoppages or additions to current medicines.</li> </ul> | <ul style="list-style-type: none"> <li>• Assessment of health condition.</li> <li>• No medicine changes required during this consultation.</li> <li>• Issue repeat prescription for current medicines.</li> </ul> | <ul style="list-style-type: none"> <li>• Assessment of health condition.</li> <li>• Medicine optimisation required during this consultation.</li> <li>• Issue prescription for optimisation of medicines, which includes changing doses of current medicines, stopping a current medicine, starting new medicines.</li> </ul> |
| <b>Type of consultation</b>                                | Walk-in and wait clinic                                                                                                                                                                                                                                                                      | By appointment                                                                                                                                                                                                    | Walk-in and wait clinic                                                                                                                                                                                                                                                                                                       |
| <b>Prescribing service operating hours</b>                 | Open 24 hours day                                                                                                                                                                                                                                                                            | Open 8 hours a day (e.g. 9am-5pm)                                                                                                                                                                                 | Open 16 hours a day (e.g. 7am-11pm)                                                                                                                                                                                                                                                                                           |
| <b>Which option would you choose?</b><br>Tick one box only | <input type="checkbox"/>                                                                                                                                                                                                                                                                     | <input type="checkbox"/>                                                                                                                                                                                          | <input type="checkbox"/>                                                                                                                                                                                                                                                                                                      |

Q7.B2).

| <b>Choice question B2:</b>                                 |                                                                                                                                                                                                                                                                                        |                                                                                                                                                                                                             |                                                                                                                                                                                                                                                                                                                         |
|------------------------------------------------------------|----------------------------------------------------------------------------------------------------------------------------------------------------------------------------------------------------------------------------------------------------------------------------------------|-------------------------------------------------------------------------------------------------------------------------------------------------------------------------------------------------------------|-------------------------------------------------------------------------------------------------------------------------------------------------------------------------------------------------------------------------------------------------------------------------------------------------------------------------|
|                                                            | <b>GP prescriber</b>                                                                                                                                                                                                                                                                   | <b>Registered Nurse prescriber</b>                                                                                                                                                                          | <b>Pharmacist prescriber</b>                                                                                                                                                                                                                                                                                            |
| <b>Location of consultation</b>                            | At GP practice                                                                                                                                                                                                                                                                         | At GP practice                                                                                                                                                                                              | At community pharmacy                                                                                                                                                                                                                                                                                                   |
| <b>Next available consultation is</b>                      | 3 days from now                                                                                                                                                                                                                                                                        | 7 days from now                                                                                                                                                                                             | 5 days from now                                                                                                                                                                                                                                                                                                         |
| <b>Cost of the consultation</b>                            | usual GP cost minus 100%                                                                                                                                                                                                                                                               | usual GP cost plus 20%                                                                                                                                                                                      | same as usual GP cost                                                                                                                                                                                                                                                                                                   |
| <b>Type of service your consultation covers</b>            | <ul style="list-style-type: none"> <li>Assessment of health condition.</li> <li>Some medicine changes required during this consultation.</li> <li>Issue prescription for current medicines with dose changes as needed, but no stoppages or additions to current medicines.</li> </ul> | <ul style="list-style-type: none"> <li>Assessment of health condition.</li> <li>No medicine changes required during this consultation.</li> <li>Issue repeat prescription for current medicines.</li> </ul> | <ul style="list-style-type: none"> <li>Assessment of health condition.</li> <li>Medicine optimisation required during this consultation.</li> <li>Issue prescription for optimisation of medicines, which includes changing doses of current medicines, stopping a current medicine, starting new medicines.</li> </ul> |
| <b>Type of consultation</b>                                | Walk-in and wait clinic                                                                                                                                                                                                                                                                | By appointment                                                                                                                                                                                              | By appointment                                                                                                                                                                                                                                                                                                          |
| <b>Prescribing service operating hours</b>                 | Open 8 hours a day (e.g. 9am-5pm)                                                                                                                                                                                                                                                      | Open 16 hours a day (e.g. 7am-11pm)                                                                                                                                                                         | Open 24 hours day                                                                                                                                                                                                                                                                                                       |
| <b>Which option would you choose?</b><br>Tick one box only | <input type="checkbox"/>                                                                                                                                                                                                                                                               | <input type="checkbox"/>                                                                                                                                                                                    | <input type="checkbox"/>                                                                                                                                                                                                                                                                                                |

Q8.B3).

| <b>Choice question B3:</b>                                 |                                                                                                                                                                                                             |                                                                                                                                                                                                             |                                                                                                                                                                                                                                                                                        |
|------------------------------------------------------------|-------------------------------------------------------------------------------------------------------------------------------------------------------------------------------------------------------------|-------------------------------------------------------------------------------------------------------------------------------------------------------------------------------------------------------------|----------------------------------------------------------------------------------------------------------------------------------------------------------------------------------------------------------------------------------------------------------------------------------------|
|                                                            | <b>GP prescriber</b>                                                                                                                                                                                        | <b>Registered Nurse prescriber</b>                                                                                                                                                                          | <b>Pharmacist prescriber</b>                                                                                                                                                                                                                                                           |
| <b>Location of consultation</b>                            | At GP practice                                                                                                                                                                                              | At GP practice                                                                                                                                                                                              | At community pharmacy                                                                                                                                                                                                                                                                  |
| <b>Next available consultation is</b>                      | 3 days from now                                                                                                                                                                                             | 5 days from now                                                                                                                                                                                             | Within 1 day from now                                                                                                                                                                                                                                                                  |
| <b>Cost of the consultation</b>                            | usual GP cost plus 20%                                                                                                                                                                                      | usual GP cost minus 100%                                                                                                                                                                                    | usual GP cost minus 20%                                                                                                                                                                                                                                                                |
| <b>Type of service your consultation covers</b>            | <ul style="list-style-type: none"> <li>Assessment of health condition.</li> <li>No medicine changes required during this consultation.</li> <li>Issue repeat prescription for current medicines.</li> </ul> | <ul style="list-style-type: none"> <li>Assessment of health condition.</li> <li>No medicine changes required during this consultation.</li> <li>Issue repeat prescription for current medicines.</li> </ul> | <ul style="list-style-type: none"> <li>Assessment of health condition.</li> <li>Some medicine changes required during this consultation.</li> <li>Issue prescription for current medicines with dose changes as needed, but no stoppages or additions to current medicines.</li> </ul> |
| <b>Type of consultation</b>                                | By appointment                                                                                                                                                                                              | Walk-in and wait clinic                                                                                                                                                                                     | By appointment                                                                                                                                                                                                                                                                         |
| <b>Prescribing service operating hours</b>                 | Open 16 hours a day (e.g. 7am-11pm)                                                                                                                                                                         | Open 8 hours a day (e.g. 9am-5pm)                                                                                                                                                                           | Open 24 hours day                                                                                                                                                                                                                                                                      |
| <b>Which option would you choose?</b><br>Tick one box only | <input type="checkbox"/>                                                                                                                                                                                    | <input type="checkbox"/>                                                                                                                                                                                    | <input type="checkbox"/>                                                                                                                                                                                                                                                               |

Q9.B4).

| <b>Choice question B4:</b>                                 |                                                                                                                                                                                                             |                                                                                                                                                                                                                                                                                                                         |                                                                                                                                                                                                             |
|------------------------------------------------------------|-------------------------------------------------------------------------------------------------------------------------------------------------------------------------------------------------------------|-------------------------------------------------------------------------------------------------------------------------------------------------------------------------------------------------------------------------------------------------------------------------------------------------------------------------|-------------------------------------------------------------------------------------------------------------------------------------------------------------------------------------------------------------|
|                                                            | <b>GP prescriber</b>                                                                                                                                                                                        | <b>Registered Nurse prescriber</b>                                                                                                                                                                                                                                                                                      | <b>Pharmacist prescriber</b>                                                                                                                                                                                |
| <b>Location of consultation</b>                            | At GP practice                                                                                                                                                                                              | At GP practice                                                                                                                                                                                                                                                                                                          | At community pharmacy                                                                                                                                                                                       |
| <b>Next available consultation is</b>                      | 7 days from now                                                                                                                                                                                             | 5 days from now                                                                                                                                                                                                                                                                                                         | 3 days from now                                                                                                                                                                                             |
| <b>Cost of the consultation</b>                            | usual GP cost minus 100%                                                                                                                                                                                    | usual GP cost plus 20%                                                                                                                                                                                                                                                                                                  | usual GP cost minus 100%                                                                                                                                                                                    |
| <b>Type of service your consultation covers</b>            | <ul style="list-style-type: none"> <li>Assessment of health condition.</li> <li>No medicine changes required during this consultation.</li> <li>Issue repeat prescription for current medicines.</li> </ul> | <ul style="list-style-type: none"> <li>Assessment of health condition.</li> <li>Medicine optimisation required during this consultation.</li> <li>Issue prescription for optimisation of medicines, which includes changing doses of current medicines, stopping a current medicine, starting new medicines.</li> </ul> | <ul style="list-style-type: none"> <li>Assessment of health condition.</li> <li>No medicine changes required during this consultation.</li> <li>Issue repeat prescription for current medicines.</li> </ul> |
| <b>Type of consultation</b>                                | Walk-in and wait clinic                                                                                                                                                                                     | By appointment                                                                                                                                                                                                                                                                                                          | By appointment                                                                                                                                                                                              |
| <b>Prescribing service operating hours</b>                 | Open 24 hours day                                                                                                                                                                                           | Open 8 hours a day (e.g. 9am-5pm)                                                                                                                                                                                                                                                                                       | Open 16 hours a day (e.g. 7am-11pm)                                                                                                                                                                         |
| <b>Which option would you choose?</b><br>Tick one box only | <input type="checkbox"/>                                                                                                                                                                                    | <input type="checkbox"/>                                                                                                                                                                                                                                                                                                | <input type="checkbox"/>                                                                                                                                                                                    |

Q10.B5).

| <b>Choice question B5:</b>                                 |                                                                                                                                                                                                                                                                                                                         |                                                                                                                                                                                                             |                                                                                                                                                                                                                                                                                        |
|------------------------------------------------------------|-------------------------------------------------------------------------------------------------------------------------------------------------------------------------------------------------------------------------------------------------------------------------------------------------------------------------|-------------------------------------------------------------------------------------------------------------------------------------------------------------------------------------------------------------|----------------------------------------------------------------------------------------------------------------------------------------------------------------------------------------------------------------------------------------------------------------------------------------|
|                                                            | <b>GP prescriber</b>                                                                                                                                                                                                                                                                                                    | <b>Registered Nurse prescriber</b>                                                                                                                                                                          | <b>Pharmacist prescriber</b>                                                                                                                                                                                                                                                           |
| <b>Location of consultation</b>                            | At GP practice                                                                                                                                                                                                                                                                                                          | At community pharmacy                                                                                                                                                                                       | At GP practice                                                                                                                                                                                                                                                                         |
| <b>Next available consultation is</b>                      | 5 days from now                                                                                                                                                                                                                                                                                                         | 7 days from now                                                                                                                                                                                             | 3 days from now                                                                                                                                                                                                                                                                        |
| <b>Cost of the consultation</b>                            | usual GP cost minus 100%                                                                                                                                                                                                                                                                                                | usual GP cost plus 20%                                                                                                                                                                                      | usual GP cost plus 20%                                                                                                                                                                                                                                                                 |
| <b>Type of service your consultation covers</b>            | <ul style="list-style-type: none"> <li>Assessment of health condition.</li> <li>Medicine optimisation required during this consultation.</li> <li>Issue prescription for optimisation of medicines, which includes changing doses of current medicines, stopping a current medicine, starting new medicines.</li> </ul> | <ul style="list-style-type: none"> <li>Assessment of health condition.</li> <li>No medicine changes required during this consultation.</li> <li>Issue repeat prescription for current medicines.</li> </ul> | <ul style="list-style-type: none"> <li>Assessment of health condition.</li> <li>Some medicine changes required during this consultation.</li> <li>Issue prescription for current medicines with dose changes as needed, but no stoppages or additions to current medicines.</li> </ul> |
| <b>Type of consultation</b>                                | Walk-in and wait clinic                                                                                                                                                                                                                                                                                                 | Walk-in and wait clinic                                                                                                                                                                                     | By appointment                                                                                                                                                                                                                                                                         |
| <b>Prescribing service operating hours</b>                 | Open 16 hours a day (e.g. 7am-11pm)                                                                                                                                                                                                                                                                                     | Open 8 hours a day (e.g. 9am-5pm)                                                                                                                                                                           | Open 8 hours a day (e.g. 9am-5pm)                                                                                                                                                                                                                                                      |
| <b>Which option would you choose?</b><br>Tick one box only | <input type="checkbox"/>                                                                                                                                                                                                                                                                                                | <input type="checkbox"/>                                                                                                                                                                                    | <input type="checkbox"/>                                                                                                                                                                                                                                                               |



Q11.B6). To help us better understand decision making in this questionnaire, can you please briefly explain why and how you made your choice in choice question B5 above?  
You can see what you chose for choice question 5 by clicking on the “prev” button and then the “next” button to come back to this question.



**Choice questions—BLOCK C:**

**Choice Questions for this questionnaire:**

Please consider the health scenario listed below and answer the **5 choice questions** that follow by ticking the option you most prefer for each choice question:

**HEALTH SCENARIO:**  
**IMAGINE you have had hypertension (i.e. high blood pressure) for some time and you need to see a prescriber who can assess your current health condition, decide if and how your medicines need adjusting, and then write and sign your prescription for your medicines.**

**IF these were the only options available at the time, which option would you choose for each choice question?**

**Make the following assumptions when making your choice:**

- All the prescribers listed in the 3 options have completed all the clinical and legal training requirements to provide the prescribing service (i.e. they can write and sign the prescription for your required high blood pressure medicines).
- All the prescribers listed in the 3 options have appropriate access to your medical records to make clinical decisions.
- The prescriber will assess your current health condition, and may perform screening and/or request additional laboratory testing as required.
- You will see a GP prescriber for a review of your condition at least once a year.
- The \$5 per prescription item charge that you pay when your medicines are dispensed at a pharmacy is a separate charge. It is not included in any of the costs within this questionnaire.

Q6.C1).

| <b>Choice question C1:</b>                                 |                                                                                                                                                                                                                   |                                                                                                                                                                                                                   |                                                                                                                                                                                                                                                                                              |
|------------------------------------------------------------|-------------------------------------------------------------------------------------------------------------------------------------------------------------------------------------------------------------------|-------------------------------------------------------------------------------------------------------------------------------------------------------------------------------------------------------------------|----------------------------------------------------------------------------------------------------------------------------------------------------------------------------------------------------------------------------------------------------------------------------------------------|
|                                                            | <b>GP prescriber</b>                                                                                                                                                                                              | <b>Registered Nurse prescriber</b>                                                                                                                                                                                | <b>Pharmacist prescriber</b>                                                                                                                                                                                                                                                                 |
| <b>Location of consultation</b>                            | At GP practice                                                                                                                                                                                                    | At community pharmacy                                                                                                                                                                                             | At GP practice                                                                                                                                                                                                                                                                               |
| <b>Next available consultation is</b>                      | Within 1 day from now                                                                                                                                                                                             | 7 days from now                                                                                                                                                                                                   | 5 days from now                                                                                                                                                                                                                                                                              |
| <b>Cost of the consultation</b>                            | usual GP cost minus 20%                                                                                                                                                                                           | usual GP cost minus 20%                                                                                                                                                                                           | usual GP cost minus 100%                                                                                                                                                                                                                                                                     |
| <b>Type of service your consultation covers</b>            | <ul style="list-style-type: none"> <li>• Assessment of health condition.</li> <li>• No medicine changes required during this consultation.</li> <li>• Issue repeat prescription for current medicines.</li> </ul> | <ul style="list-style-type: none"> <li>• Assessment of health condition.</li> <li>• No medicine changes required during this consultation.</li> <li>• Issue repeat prescription for current medicines.</li> </ul> | <ul style="list-style-type: none"> <li>• Assessment of health condition.</li> <li>• Some medicine changes required during this consultation.</li> <li>• Issue prescription for current medicines with dose changes as needed, but no stoppages or additions to current medicines.</li> </ul> |
| <b>Type of consultation</b>                                | Walk-in and wait clinic                                                                                                                                                                                           | By appointment                                                                                                                                                                                                    | By appointment                                                                                                                                                                                                                                                                               |
| <b>Prescribing service operating hours</b>                 | Open 16 hours a day (e.g. 7am-11pm)                                                                                                                                                                               | Open 24 hours day                                                                                                                                                                                                 | Open 8 hours a day (e.g. 9am-5pm)                                                                                                                                                                                                                                                            |
| <b>Which option would you choose?</b><br>Tick one box only | <input type="checkbox"/>                                                                                                                                                                                          | <input type="checkbox"/>                                                                                                                                                                                          | <input type="checkbox"/>                                                                                                                                                                                                                                                                     |

Q7.C2).

| <b>Choice question C2:</b>                                 |                                                                                                                                                                                                             |                                                                                                                                                                                                                                                                                        |                                                                                                                                                                                                                                                                                                                         |
|------------------------------------------------------------|-------------------------------------------------------------------------------------------------------------------------------------------------------------------------------------------------------------|----------------------------------------------------------------------------------------------------------------------------------------------------------------------------------------------------------------------------------------------------------------------------------------|-------------------------------------------------------------------------------------------------------------------------------------------------------------------------------------------------------------------------------------------------------------------------------------------------------------------------|
|                                                            | <b>GP prescriber</b>                                                                                                                                                                                        | <b>Registered Nurse prescriber</b>                                                                                                                                                                                                                                                     | <b>Pharmacist prescriber</b>                                                                                                                                                                                                                                                                                            |
| <b>Location of consultation</b>                            | At GP practice                                                                                                                                                                                              | At community pharmacy                                                                                                                                                                                                                                                                  | At GP practice                                                                                                                                                                                                                                                                                                          |
| <b>Next available consultation is</b>                      | 5 days from now                                                                                                                                                                                             | 5 days from now                                                                                                                                                                                                                                                                        | Within 1 day from now                                                                                                                                                                                                                                                                                                   |
| <b>Cost of the consultation</b>                            | usual GP cost plus 20%                                                                                                                                                                                      | usual GP cost minus 100%                                                                                                                                                                                                                                                               | usual GP cost plus 20%                                                                                                                                                                                                                                                                                                  |
| <b>Type of service your consultation covers</b>            | <ul style="list-style-type: none"> <li>Assessment of health condition.</li> <li>No medicine changes required during this consultation.</li> <li>Issue repeat prescription for current medicines.</li> </ul> | <ul style="list-style-type: none"> <li>Assessment of health condition.</li> <li>Some medicine changes required during this consultation.</li> <li>Issue prescription for current medicines with dose changes as needed, but no stoppages or additions to current medicines.</li> </ul> | <ul style="list-style-type: none"> <li>Assessment of health condition.</li> <li>Medicine optimisation required during this consultation.</li> <li>Issue prescription for optimisation of medicines, which includes changing doses of current medicines, stopping a current medicine, starting new medicines.</li> </ul> |
| <b>Type of consultation</b>                                | By appointment                                                                                                                                                                                              | Walk-in and wait clinic                                                                                                                                                                                                                                                                | Walk-in and wait clinic                                                                                                                                                                                                                                                                                                 |
| <b>Prescribing service operating hours</b>                 | Open 24 hours day                                                                                                                                                                                           | Open 16 hours a day (e.g. 7am-11pm)                                                                                                                                                                                                                                                    | Open 8 hours a day (e.g. 9am-5pm)                                                                                                                                                                                                                                                                                       |
| <b>Which option would you choose?</b><br>Tick one box only | <input type="checkbox"/>                                                                                                                                                                                    | <input type="checkbox"/>                                                                                                                                                                                                                                                               | <input type="checkbox"/>                                                                                                                                                                                                                                                                                                |

Q8.C3).

| <b>Choice question C3:</b>                                 |                                                                                                                                                                                                                                                                                        |                                                                                                                                                                                                                                                                                        |                                                                                                                                                                                                                                                                                                                         |
|------------------------------------------------------------|----------------------------------------------------------------------------------------------------------------------------------------------------------------------------------------------------------------------------------------------------------------------------------------|----------------------------------------------------------------------------------------------------------------------------------------------------------------------------------------------------------------------------------------------------------------------------------------|-------------------------------------------------------------------------------------------------------------------------------------------------------------------------------------------------------------------------------------------------------------------------------------------------------------------------|
|                                                            | <b>GP prescriber</b>                                                                                                                                                                                                                                                                   | <b>Registered Nurse prescriber</b>                                                                                                                                                                                                                                                     | <b>Pharmacist prescriber</b>                                                                                                                                                                                                                                                                                            |
| <b>Location of consultation</b>                            | At GP practice                                                                                                                                                                                                                                                                         | At community pharmacy                                                                                                                                                                                                                                                                  | At GP practice                                                                                                                                                                                                                                                                                                          |
| <b>Next available consultation is</b>                      | 5 days from now                                                                                                                                                                                                                                                                        | 5 days from now                                                                                                                                                                                                                                                                        | 7 days from now                                                                                                                                                                                                                                                                                                         |
| <b>Cost of the consultation</b>                            | usual GP cost plus 20%                                                                                                                                                                                                                                                                 | usual GP cost plus 20%                                                                                                                                                                                                                                                                 | usual GP cost minus 100%                                                                                                                                                                                                                                                                                                |
| <b>Type of service your consultation covers</b>            | <ul style="list-style-type: none"> <li>Assessment of health condition.</li> <li>Some medicine changes required during this consultation.</li> <li>Issue prescription for current medicines with dose changes as needed, but no stoppages or additions to current medicines.</li> </ul> | <ul style="list-style-type: none"> <li>Assessment of health condition.</li> <li>Some medicine changes required during this consultation.</li> <li>Issue prescription for current medicines with dose changes as needed, but no stoppages or additions to current medicines.</li> </ul> | <ul style="list-style-type: none"> <li>Assessment of health condition.</li> <li>Medicine optimisation required during this consultation.</li> <li>Issue prescription for optimisation of medicines, which includes changing doses of current medicines, stopping a current medicine, starting new medicines.</li> </ul> |
| <b>Type of consultation</b>                                | By appointment                                                                                                                                                                                                                                                                         | Walk-in and wait clinic                                                                                                                                                                                                                                                                | By appointment                                                                                                                                                                                                                                                                                                          |
| <b>Prescribing service operating hours</b>                 | Open 8 hours a day (e.g. 9am-5pm)                                                                                                                                                                                                                                                      | Open 24 hours day                                                                                                                                                                                                                                                                      | Open 16 hours a day (e.g. 7am-11pm)                                                                                                                                                                                                                                                                                     |
| <b>Which option would you choose?</b><br>Tick one box only | <input type="checkbox"/>                                                                                                                                                                                                                                                               | <input type="checkbox"/>                                                                                                                                                                                                                                                               | <input type="checkbox"/>                                                                                                                                                                                                                                                                                                |

Q9.C4).

| <b>Choice question C4:</b>                                 |                                                                                                                                                                                                                                                                                                                         |                                                                                                                                                                                                                                                                                        |                                                                                                                                                                                                             |
|------------------------------------------------------------|-------------------------------------------------------------------------------------------------------------------------------------------------------------------------------------------------------------------------------------------------------------------------------------------------------------------------|----------------------------------------------------------------------------------------------------------------------------------------------------------------------------------------------------------------------------------------------------------------------------------------|-------------------------------------------------------------------------------------------------------------------------------------------------------------------------------------------------------------|
|                                                            | <b>GP prescriber</b>                                                                                                                                                                                                                                                                                                    | <b>Registered Nurse prescriber</b>                                                                                                                                                                                                                                                     | <b>Pharmacist prescriber</b>                                                                                                                                                                                |
| <b>Location of consultation</b>                            | At GP practice                                                                                                                                                                                                                                                                                                          | At GP practice                                                                                                                                                                                                                                                                         | At GP practice                                                                                                                                                                                              |
| <b>Next available consultation is</b>                      | 3 days from now                                                                                                                                                                                                                                                                                                         | 5 days from now                                                                                                                                                                                                                                                                        | Within 1 day from now                                                                                                                                                                                       |
| <b>Cost of the consultation</b>                            | usual GP cost minus 100%                                                                                                                                                                                                                                                                                                | usual GP cost plus 20%                                                                                                                                                                                                                                                                 | same as usual GP cost                                                                                                                                                                                       |
| <b>Type of service your consultation covers</b>            | <ul style="list-style-type: none"> <li>Assessment of health condition.</li> <li>Medicine optimisation required during this consultation.</li> <li>Issue prescription for optimisation of medicines, which includes changing doses of current medicines, stopping a current medicine, starting new medicines.</li> </ul> | <ul style="list-style-type: none"> <li>Assessment of health condition.</li> <li>Some medicine changes required during this consultation.</li> <li>Issue prescription for current medicines with dose changes as needed, but no stoppages or additions to current medicines.</li> </ul> | <ul style="list-style-type: none"> <li>Assessment of health condition.</li> <li>No medicine changes required during this consultation.</li> <li>Issue repeat prescription for current medicines.</li> </ul> |
| <b>Type of consultation</b>                                | By appointment                                                                                                                                                                                                                                                                                                          | By appointment                                                                                                                                                                                                                                                                         | Walk-in and wait clinic                                                                                                                                                                                     |
| <b>Prescribing service operating hours</b>                 | Open 24 hours day                                                                                                                                                                                                                                                                                                       | Open 16 hours a day (e.g. 7am-11pm)                                                                                                                                                                                                                                                    | Open 8 hours a day (e.g. 9am-5pm)                                                                                                                                                                           |
| <b>Which option would you choose?</b><br>Tick one box only | <input type="checkbox"/>                                                                                                                                                                                                                                                                                                | <input type="checkbox"/>                                                                                                                                                                                                                                                               | <input type="checkbox"/>                                                                                                                                                                                    |

Q10.C5).

| <b>Choice question C5:</b>                                 |                                                                                                                                                                                                             |                                                                                                                                                                                                                                                                                                                         |                                                                                                                                                                                                                                                                                                                         |
|------------------------------------------------------------|-------------------------------------------------------------------------------------------------------------------------------------------------------------------------------------------------------------|-------------------------------------------------------------------------------------------------------------------------------------------------------------------------------------------------------------------------------------------------------------------------------------------------------------------------|-------------------------------------------------------------------------------------------------------------------------------------------------------------------------------------------------------------------------------------------------------------------------------------------------------------------------|
|                                                            | <b>GP prescriber</b>                                                                                                                                                                                        | <b>Registered Nurse prescriber</b>                                                                                                                                                                                                                                                                                      | <b>Pharmacist prescriber</b>                                                                                                                                                                                                                                                                                            |
| <b>Location of consultation</b>                            | At GP practice                                                                                                                                                                                              | At GP practice                                                                                                                                                                                                                                                                                                          | At community pharmacy                                                                                                                                                                                                                                                                                                   |
| <b>Next available consultation is</b>                      | 5 days from now                                                                                                                                                                                             | Within 1 day from now                                                                                                                                                                                                                                                                                                   | 3 days from now                                                                                                                                                                                                                                                                                                         |
| <b>Cost of the consultation</b>                            | usual GP cost minus 100%                                                                                                                                                                                    | same as usual GP cost                                                                                                                                                                                                                                                                                                   | usual GP cost plus 20%                                                                                                                                                                                                                                                                                                  |
| <b>Type of service your consultation covers</b>            | <ul style="list-style-type: none"> <li>Assessment of health condition.</li> <li>No medicine changes required during this consultation.</li> <li>Issue repeat prescription for current medicines.</li> </ul> | <ul style="list-style-type: none"> <li>Assessment of health condition.</li> <li>Medicine optimisation required during this consultation.</li> <li>Issue prescription for optimisation of medicines, which includes changing doses of current medicines, stopping a current medicine, starting new medicines.</li> </ul> | <ul style="list-style-type: none"> <li>Assessment of health condition.</li> <li>Medicine optimisation required during this consultation.</li> <li>Issue prescription for optimisation of medicines, which includes changing doses of current medicines, stopping a current medicine, starting new medicines.</li> </ul> |
| <b>Type of consultation</b>                                | By appointment                                                                                                                                                                                              | By appointment                                                                                                                                                                                                                                                                                                          | Walk-in and wait clinic                                                                                                                                                                                                                                                                                                 |
| <b>Prescribing service operating hours</b>                 | Open 8 hours a day (e.g. 9am-5pm)                                                                                                                                                                           | Open 24 hours day                                                                                                                                                                                                                                                                                                       | Open 16 hours a day (e.g. 7am-11pm)                                                                                                                                                                                                                                                                                     |
| <b>Which option would you choose?</b><br>Tick one box only | <input type="checkbox"/>                                                                                                                                                                                    | <input type="checkbox"/>                                                                                                                                                                                                                                                                                                | <input type="checkbox"/>                                                                                                                                                                                                                                                                                                |

Q11.C6). To help us better understand decision making in this questionnaire, can you please briefly explain why and how you made your choice in choice question C5 above?  
You can see what you chose for choice question 5 by clicking on the “prev” button and then the “next” button to come back to this question.



**Choice questions—BLOCK D:**

**Choice Questions for this questionnaire:**

Please consider the health scenario listed below and answer the **5 choice questions** that follow by ticking the option you most prefer for each choice question:

**HEALTH SCENARIO:**  
**IMAGINE you have had hypertension (i.e. high blood pressure) for some time and you need to see a prescriber who can assess your current health condition, decide if and how your medicines need adjusting, and then write and sign your prescription for your medicines.**

**IF these were the only options available at the time, which option would you choose for each choice question?**

**Make the following assumptions when making your choice:**

- All the prescribers listed in the 3 options have completed all the clinical and legal training requirements to provide the prescribing service (i.e. they can write and sign the prescription for your required high blood pressure medicines).
- All the prescribers listed in the 3 options have appropriate access to your medical records to make clinical decisions.
- The prescriber will assess your current health condition, and may perform screening and/or request additional laboratory testing as required.
- You will see a GP prescriber for a review of your condition at least once a year.
- The \$5 per prescription item charge that you pay when your medicines are dispensed at a pharmacy is a separate charge. It is not included in any of the costs within this questionnaire.

Q6.D1).

| Choice question D1:                                        |                                                                                                                                                                                                                   |                                                                                                                                                                                                                                                                                                                               |                                                                                                                                                                                                                                                                                              |
|------------------------------------------------------------|-------------------------------------------------------------------------------------------------------------------------------------------------------------------------------------------------------------------|-------------------------------------------------------------------------------------------------------------------------------------------------------------------------------------------------------------------------------------------------------------------------------------------------------------------------------|----------------------------------------------------------------------------------------------------------------------------------------------------------------------------------------------------------------------------------------------------------------------------------------------|
|                                                            | GP prescriber                                                                                                                                                                                                     | Registered Nurse prescriber                                                                                                                                                                                                                                                                                                   | Pharmacist prescriber                                                                                                                                                                                                                                                                        |
| <b>Location of consultation</b>                            | At GP practice                                                                                                                                                                                                    | At community pharmacy                                                                                                                                                                                                                                                                                                         | At GP practice                                                                                                                                                                                                                                                                               |
| <b>Next available consultation is</b>                      | 5 days from now                                                                                                                                                                                                   | 3 days from now                                                                                                                                                                                                                                                                                                               | 7 days from now                                                                                                                                                                                                                                                                              |
| <b>Cost of the consultation</b>                            | usual GP cost plus 20%                                                                                                                                                                                            | usual GP cost minus 100%                                                                                                                                                                                                                                                                                                      | usual GP cost plus 20%                                                                                                                                                                                                                                                                       |
| <b>Type of service your consultation covers</b>            | <ul style="list-style-type: none"> <li>• Assessment of health condition.</li> <li>• No medicine changes required during this consultation.</li> <li>• Issue repeat prescription for current medicines.</li> </ul> | <ul style="list-style-type: none"> <li>• Assessment of health condition.</li> <li>• Medicine optimisation required during this consultation.</li> <li>• Issue prescription for optimisation of medicines, which includes changing doses of current medicines, stopping a current medicine, starting new medicines.</li> </ul> | <ul style="list-style-type: none"> <li>• Assessment of health condition.</li> <li>• Some medicine changes required during this consultation.</li> <li>• Issue prescription for current medicines with dose changes as needed, but no stoppages or additions to current medicines.</li> </ul> |
| <b>Type of consultation</b>                                | Walk-in and wait clinic                                                                                                                                                                                           | Walk-in and wait clinic                                                                                                                                                                                                                                                                                                       | By appointment                                                                                                                                                                                                                                                                               |
| <b>Prescribing service operating hours</b>                 | Open 24 hours day                                                                                                                                                                                                 | Open 8 hours a day (e.g. 9am-5pm)                                                                                                                                                                                                                                                                                             | Open 16 hours a day (e.g. 7am-11pm)                                                                                                                                                                                                                                                          |
| <b>Which option would you choose?</b><br>Tick one box only | <input type="checkbox"/>                                                                                                                                                                                          | <input type="checkbox"/>                                                                                                                                                                                                                                                                                                      | <input type="checkbox"/>                                                                                                                                                                                                                                                                     |

Q7.D2).

| Choice question D2:                                 |                                                                                                                                                                                                                                                                                        |                                                                                                                                                                                                             |                                                                                                                                                                                                                                                                                                                         |
|-----------------------------------------------------|----------------------------------------------------------------------------------------------------------------------------------------------------------------------------------------------------------------------------------------------------------------------------------------|-------------------------------------------------------------------------------------------------------------------------------------------------------------------------------------------------------------|-------------------------------------------------------------------------------------------------------------------------------------------------------------------------------------------------------------------------------------------------------------------------------------------------------------------------|
|                                                     | GP prescriber                                                                                                                                                                                                                                                                          | Registered Nurse prescriber                                                                                                                                                                                 | Pharmacist prescriber                                                                                                                                                                                                                                                                                                   |
| Location of consultation                            | At GP practice                                                                                                                                                                                                                                                                         | At GP practice                                                                                                                                                                                              | At community pharmacy                                                                                                                                                                                                                                                                                                   |
| Next available consultation is                      | 7 days from now                                                                                                                                                                                                                                                                        | Within 1 day from now                                                                                                                                                                                       | 5 days from now                                                                                                                                                                                                                                                                                                         |
| Cost of the consultation                            | usual GP cost plus 20%                                                                                                                                                                                                                                                                 | usual GP cost minus 100%                                                                                                                                                                                    | usual GP cost plus 20%                                                                                                                                                                                                                                                                                                  |
| Type of service your consultation covers            | <ul style="list-style-type: none"> <li>Assessment of health condition.</li> <li>Some medicine changes required during this consultation.</li> <li>Issue prescription for current medicines with dose changes as needed, but no stoppages or additions to current medicines.</li> </ul> | <ul style="list-style-type: none"> <li>Assessment of health condition.</li> <li>No medicine changes required during this consultation.</li> <li>Issue repeat prescription for current medicines.</li> </ul> | <ul style="list-style-type: none"> <li>Assessment of health condition.</li> <li>Medicine optimisation required during this consultation.</li> <li>Issue prescription for optimisation of medicines, which includes changing doses of current medicines, stopping a current medicine, starting new medicines.</li> </ul> |
| Type of consultation                                | Walk-in and wait clinic                                                                                                                                                                                                                                                                | By appointment                                                                                                                                                                                              | Walk-in and wait clinic                                                                                                                                                                                                                                                                                                 |
| Prescribing service operating hours                 | Open 8 hours a day (e.g. 9am-5pm)                                                                                                                                                                                                                                                      | Open 24 hours day                                                                                                                                                                                           | Open 24 hours day                                                                                                                                                                                                                                                                                                       |
| Which option would you choose?<br>Tick one box only | <input type="checkbox"/>                                                                                                                                                                                                                                                               | <input type="checkbox"/>                                                                                                                                                                                    | <input type="checkbox"/>                                                                                                                                                                                                                                                                                                |

Q8.D3).

| Choice question D3:                                 |                                                                                                                                                                                                                                                                                        |                                                                                                                                                                                                                                                                                                                         |                                                                                                                                                                                                             |
|-----------------------------------------------------|----------------------------------------------------------------------------------------------------------------------------------------------------------------------------------------------------------------------------------------------------------------------------------------|-------------------------------------------------------------------------------------------------------------------------------------------------------------------------------------------------------------------------------------------------------------------------------------------------------------------------|-------------------------------------------------------------------------------------------------------------------------------------------------------------------------------------------------------------|
|                                                     | GP prescriber                                                                                                                                                                                                                                                                          | Registered Nurse prescriber                                                                                                                                                                                                                                                                                             | Pharmacist prescriber                                                                                                                                                                                       |
| Location of consultation                            | At GP practice                                                                                                                                                                                                                                                                         | At GP practice                                                                                                                                                                                                                                                                                                          | At community pharmacy                                                                                                                                                                                       |
| Next available consultation is                      | Within 1 day from now                                                                                                                                                                                                                                                                  | 5 days from now                                                                                                                                                                                                                                                                                                         | 3 days from now                                                                                                                                                                                             |
| Cost of the consultation                            | usual GP cost minus 100%                                                                                                                                                                                                                                                               | usual GP cost plus 20%                                                                                                                                                                                                                                                                                                  | usual GP cost minus 100%                                                                                                                                                                                    |
| Type of service your consultation covers            | <ul style="list-style-type: none"> <li>Assessment of health condition.</li> <li>Some medicine changes required during this consultation.</li> <li>Issue prescription for current medicines with dose changes as needed, but no stoppages or additions to current medicines.</li> </ul> | <ul style="list-style-type: none"> <li>Assessment of health condition.</li> <li>Medicine optimisation required during this consultation.</li> <li>Issue prescription for optimisation of medicines, which includes changing doses of current medicines, stopping a current medicine, starting new medicines.</li> </ul> | <ul style="list-style-type: none"> <li>Assessment of health condition.</li> <li>No medicine changes required during this consultation.</li> <li>Issue repeat prescription for current medicines.</li> </ul> |
| Type of consultation                                | By appointment                                                                                                                                                                                                                                                                         | Walk-in and wait clinic                                                                                                                                                                                                                                                                                                 | Walk-in and wait clinic                                                                                                                                                                                     |
| Prescribing service operating hours                 | Open 8 hours a day (e.g. 9am-5pm)                                                                                                                                                                                                                                                      | Open 24 hours day                                                                                                                                                                                                                                                                                                       | Open 16 hours a day (e.g. 7am-11pm)                                                                                                                                                                         |
| Which option would you choose?<br>Tick one box only | <input type="checkbox"/>                                                                                                                                                                                                                                                               | <input type="checkbox"/>                                                                                                                                                                                                                                                                                                | <input type="checkbox"/>                                                                                                                                                                                    |

Q9.D4).

| <b>Choice question D4:</b>                                 |                                                                                                                                                                                                             |                                                                                                                                                                                                                                                                                        |                                                                                                                                                                                                                                                                                                                         |
|------------------------------------------------------------|-------------------------------------------------------------------------------------------------------------------------------------------------------------------------------------------------------------|----------------------------------------------------------------------------------------------------------------------------------------------------------------------------------------------------------------------------------------------------------------------------------------|-------------------------------------------------------------------------------------------------------------------------------------------------------------------------------------------------------------------------------------------------------------------------------------------------------------------------|
|                                                            | <b>GP prescriber</b>                                                                                                                                                                                        | <b>Registered Nurse prescriber</b>                                                                                                                                                                                                                                                     | <b>Pharmacist prescriber</b>                                                                                                                                                                                                                                                                                            |
| <b>Location of consultation</b>                            | At GP practice                                                                                                                                                                                              | At GP practice                                                                                                                                                                                                                                                                         | At community pharmacy                                                                                                                                                                                                                                                                                                   |
| <b>Next available consultation is</b>                      | 3 days from now                                                                                                                                                                                             | 5 days from now                                                                                                                                                                                                                                                                        | 7 days from now                                                                                                                                                                                                                                                                                                         |
| <b>Cost of the consultation</b>                            | same as usual GP cost                                                                                                                                                                                       | usual GP cost minus 20%                                                                                                                                                                                                                                                                | usual GP cost minus 100%                                                                                                                                                                                                                                                                                                |
| <b>Type of service your consultation covers</b>            | <ul style="list-style-type: none"> <li>Assessment of health condition.</li> <li>No medicine changes required during this consultation.</li> <li>Issue repeat prescription for current medicines.</li> </ul> | <ul style="list-style-type: none"> <li>Assessment of health condition.</li> <li>Some medicine changes required during this consultation.</li> <li>Issue prescription for current medicines with dose changes as needed, but no stoppages or additions to current medicines.</li> </ul> | <ul style="list-style-type: none"> <li>Assessment of health condition.</li> <li>Medicine optimisation required during this consultation.</li> <li>Issue prescription for optimisation of medicines, which includes changing doses of current medicines, stopping a current medicine, starting new medicines.</li> </ul> |
| <b>Type of consultation</b>                                | By appointment                                                                                                                                                                                              | By appointment                                                                                                                                                                                                                                                                         | Walk-in and wait clinic                                                                                                                                                                                                                                                                                                 |
| <b>Prescribing service operating hours</b>                 | Open 8 hours a day (e.g. 9am-5pm)                                                                                                                                                                           | Open 16 hours a day (e.g. 7am-11pm)                                                                                                                                                                                                                                                    | Open 24 hours day                                                                                                                                                                                                                                                                                                       |
| <b>Which option would you choose?</b><br>Tick one box only | <input type="checkbox"/>                                                                                                                                                                                    | <input type="checkbox"/>                                                                                                                                                                                                                                                               | <input type="checkbox"/>                                                                                                                                                                                                                                                                                                |

Q10.D5).

| <b>Choice question D5:</b>                                 |                                                                                                                                                                                                                                                                                                                         |                                                                                                                                                                                                                                                                                        |                                                                                                                                                                                                             |
|------------------------------------------------------------|-------------------------------------------------------------------------------------------------------------------------------------------------------------------------------------------------------------------------------------------------------------------------------------------------------------------------|----------------------------------------------------------------------------------------------------------------------------------------------------------------------------------------------------------------------------------------------------------------------------------------|-------------------------------------------------------------------------------------------------------------------------------------------------------------------------------------------------------------|
|                                                            | <b>GP prescriber</b>                                                                                                                                                                                                                                                                                                    | <b>Registered Nurse prescriber</b>                                                                                                                                                                                                                                                     | <b>Pharmacist prescriber</b>                                                                                                                                                                                |
| <b>Location of consultation</b>                            | At GP practice                                                                                                                                                                                                                                                                                                          | At community pharmacy                                                                                                                                                                                                                                                                  | At GP practice                                                                                                                                                                                              |
| <b>Next available consultation is</b>                      | 7 days from now                                                                                                                                                                                                                                                                                                         | Within 1 day from now                                                                                                                                                                                                                                                                  | 3 days from now                                                                                                                                                                                             |
| <b>Cost of the consultation</b>                            | usual GP cost minus 20%                                                                                                                                                                                                                                                                                                 | usual GP cost minus 20%                                                                                                                                                                                                                                                                | usual GP cost minus 100%                                                                                                                                                                                    |
| <b>Type of service your consultation covers</b>            | <ul style="list-style-type: none"> <li>Assessment of health condition.</li> <li>Medicine optimisation required during this consultation.</li> <li>Issue prescription for optimisation of medicines, which includes changing doses of current medicines, stopping a current medicine, starting new medicines.</li> </ul> | <ul style="list-style-type: none"> <li>Assessment of health condition.</li> <li>Some medicine changes required during this consultation.</li> <li>Issue prescription for current medicines with dose changes as needed, but no stoppages or additions to current medicines.</li> </ul> | <ul style="list-style-type: none"> <li>Assessment of health condition.</li> <li>No medicine changes required during this consultation.</li> <li>Issue repeat prescription for current medicines.</li> </ul> |
| <b>Type of consultation</b>                                | Walk-in and wait clinic                                                                                                                                                                                                                                                                                                 | Walk-in and wait clinic                                                                                                                                                                                                                                                                | By appointment                                                                                                                                                                                              |
| <b>Prescribing service operating hours</b>                 | Open 24 hours day                                                                                                                                                                                                                                                                                                       | Open 16 hours a day (e.g. 7am-11pm)                                                                                                                                                                                                                                                    | Open 8 hours a day (e.g. 9am-5pm)                                                                                                                                                                           |
| <b>Which option would you choose?</b><br>Tick one box only | <input type="checkbox"/>                                                                                                                                                                                                                                                                                                | <input type="checkbox"/>                                                                                                                                                                                                                                                               | <input type="checkbox"/>                                                                                                                                                                                    |



Q11.D6). To help us better understand decision making in this questionnaire, can you please briefly explain why and how you made your choice in choice question D5 above?  
You can see what you chose for choice question 5 by clicking on the “prev” button and then the “next” button to come back to this question.

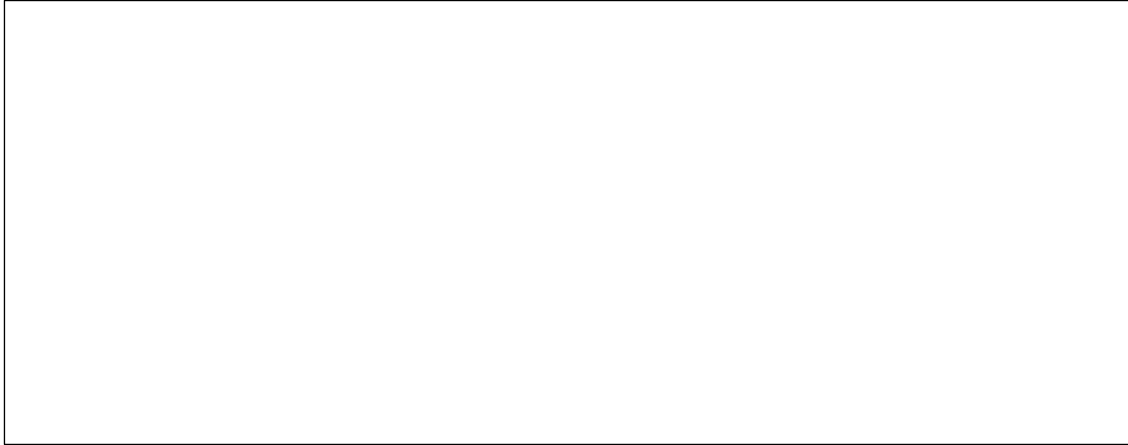A large, empty rectangular box with a thin black border, intended for the respondent to provide a brief explanation of their choice in question D5.

**Section 4: Attribute-related questions:**

12). Please indicate how easy you found it to complete the 5 choice task questions in the previous section:

- Extremely easy
- Moderately easy
- Moderately difficult
- Extremely difficult

13). From the 3 prescribers listed below, please choose which prescriber is your most preferred and which prescriber is your least preferred.

|                       | <b>Most preferred</b> | <b>Least preferred</b> |
|-----------------------|-----------------------|------------------------|
| GP prescriber         | <input type="radio"/> | <input type="radio"/>  |
| Pharmacist prescriber | <input type="radio"/> | <input type="radio"/>  |
| Nurse prescriber      | <input type="radio"/> | <input type="radio"/>  |

14). Please briefly explain why you ranked the prescriber selected in question <13> above as your **most**

15). Please briefly explain why you ranked the prescriber selected in question <13> above as your **least preferred** prescriber?

16). Before completing this questionnaire, did you know that **pharmacist prescribers** in New Zealand are pharmacists who complete additional training and can prescribe some prescription medicines (i.e. during a consultation with them, they assess your condition and can write and sign your prescription, just like your GP does, for specific approved prescription medicines)?

- Yes
- No

17). Before completing this questionnaire, did you know that **registered nurse prescribers** in New Zealand are registered nurses who complete additional training and can prescribe some prescription medicines (i.e. during a consultation with them, they assess your condition and can write and sign your prescription, just like your GP does, for specific approved prescription medicines)?

- Yes
- No

18). Currently, how satisfied are you with your ACCESS to a GP overall (i.e. you can see/make an appointment with your GP when you want to)?

- Extremely satisfied
- Somewhat satisfied
- Somewhat dissatisfied
- Extremely dissatisfied

**Section 5: Sociodemographic questions**

19). What is your highest level of education?

- Finished primary school
- Finished high school
- Any university qualification
- Apprenticeship (and no university or polytechnic qualification)
- Any polytechnic qualification
- Other, please specify

20). What is your household income per year, in NZ dollars before tax?

- less than \$25 000 per year
- more than \$25 000 to \$50 000 per year
- more than \$50 000 to \$80 000 per year
- more than \$80 000 to \$100 000 per year
- more than \$100 000 per year

21). Select what type of employment applies to you

- Full time ( $\geq$  30 hours/week)
- Part time ( $<$  30 hours/week)
- Unemployed

22). What type of area do you live in?

- Major city (urban area with population  $>$  50 000 people e.g. Auckland, Wellington, Christchurch, Dunedin, Hamilton, etc.)
- Provincial city (urban area with population  $>$  30 000 people e.g. Nelson, New Plymouth, Napier, Gisborne etc.)
- Provincial town (urban area with a population between 1 000 and 30 000 people e.g. Levin, Gore, etc.)
- Rural (non-urban areas such as rural centres with population under 1 000 people)

23). Which NZ region do you live in?

- Northland
- Auckland
- Waikato
- Bay of Plenty
- Gisborne
- Hawkes Bay
- Taranaki
- Manawatu-Whanganui
- Wellington
- Tasman
- Nelson
- Marlborough
- West Coast
- Canterbury
- Otago
- Southland
- Other, please specify

24). When you visit your GP practice to see a doctor, do you usually

- See the same GP each time (i.e. your own GP)
- See any available GP

25). How often do you visit the GP?

- Never
- Once a year
- Once every 6 months
- Once every 3 months
- Once a month
- More often than once a month

26). When you visit a community pharmacy, do you

- Visit the same community pharmacy most of the time
- Use different community pharmacies most of the time due to convenience

27). How often do you visit a community pharmacy?

- Never
- Once a year
- Once every 6 months
- Once every 3 months
- Once a month
- More often than once a month

28). How many medicines do you take per day on a regular basis?

29). How many long term or chronic conditions have you been diagnosed with?

Please click the button on the bottom right to submit your answers and finish the questionnaire.

We thank you for your time spent completing this questionnaire.
